# Supplementary material for: Synthesis of trifluoromethylated aza-BODIPYs as fluorescence-19F MRI dual imaging and photodynamic agents
Source: Royal Society of Chemistry journal article supplement (doi:10.1039/d2ob00297c), 2022-01-01
Supplement: d2ob00297c1.pdf [file d2ob00297c1.pdf]

# Supporting Information

## Synthesis of trifluoromethylated aza-BODIPYs as fluorescence-<sup>19</sup>F MRI dual imaging and photodynamic agents

Anfeng Li,<sup>†ab</sup> Xingxing Peng,<sup>†ab</sup> Mou Jiang,<sup>†c</sup> Tingjuan Wu,<sup>ab</sup> Kexin Chen,<sup>ab</sup> Zhigang Yang,<sup>b</sup> Shizhen Chen,<sup>c</sup> Xin Zhou,<sup>c</sup> Xing Zheng<sup>\*a</sup> and Zhong-Xing Jiang<sup>\*bc</sup>

<sup>a</sup> Group of Lead Compound, Department of Pharmacy, Hunan Provincial Key Laboratory of Tumor Microenvironment Responsive Drug Research, Hunan Province Cooperative Innovation Center for Molecular Target New Drug Study, University of South China, Hengyang 421001, China. E-mail: zhengxing9166@sohu.com

<sup>b</sup> Hubei Province Engineering and Technology Research Center for Fluorinated Pharmaceuticals, School of Pharmaceutical Sciences, Wuhan University, Wuhan 430071, China. E-mail: zxjiang@whu.edu.cn

<sup>c</sup> State Key Laboratory of Magnetic Resonance and Atomic and Molecular Physics, National Center for Magnetic Resonance in Wuhan, Wuhan Institute of Physics and Mathematics, Innovative Academy of Precision Measurement Science and Technology, Chinese Academy of Sciences, Wuhan 430071, China.

### Table of contents

|                                                                                                        |   |
|--------------------------------------------------------------------------------------------------------|---|
| 1. Fluorescence quantum efficiency .....                                                               | 2 |
| 2. Photothermal properties .....                                                                       | 2 |
| 3. Singlet oxygen properties .....                                                                     | 2 |
| 4. Synthesis of the compounds .....                                                                    | 4 |
| 5. UV–Vis absorption of <b>1b</b> in chloroform. ....                                                  | 7 |
| 6. UV–Vis absorption of DPBF in chloroform. ....                                                       | 8 |
| 7. Copies of <sup>1</sup> H, <sup>13</sup> C, <sup>19</sup> F NMR, and HRMS spectra of compounds. .... | 9 |

## 1. Fluorescence quantum efficiency

**1c** in chloroform ( $\Phi_f = 0.34$ ) was used as the reference for the calculation of quantum yield. All sample were used chloroform as solvent and the concentration with UV-absorption value at 0.01-0.05 was used to reduce the reabsorption effects. Quantum yields were calculated using the following formula (1):<sup>1</sup>

$$\Phi_{fX} = \Phi_{fR} \times \frac{F_X}{F_R} \times \left( \frac{1 - e^{-A_R^{\lambda_{ex}}}}{1 - 10^{-A_R^{\lambda_{ex}}}} \right) \times \left( \frac{n_X^2}{n_R^2} \right) \quad (1)$$

The X and R respectively represent our compounds and the known standard reference substance **1c**. F denotes the integrated area of the fluorescence spectrum.  $A(\lambda_{ex})$  stands for the absorbance at the excitation wavelength, and n represents the refractive index of the solvent.

## 2. Photothermal properties

The temperature changes of the sample in chloroform (20  $\mu$ M) under laser irradiation ( $\lambda = 660$  nm, 0.5 W/cm<sup>2</sup>, h = 10 cm) for 6 min were recorded by a thermal imager. The final result was the average value of three parallel tests.

## 3. Singlet oxygen properties

The singlet oxygen generation of **1a-1f** was investigated by using 1,3-diphenylisobenzofuran (DPBF) as the singlet oxygen indicator. The compounds **1a-1f** at the concentration of 3  $\mu$ M were mixed with a solution of DPBF (40  $\mu$ M) in chloroform. Under irradiation (660 nm) at 0.5 W/cm<sup>2</sup>, the absorbance changes of DPBF at 415 nm were recorded. The final result was the average value of three parallel tests. Singlet oxygen quantum yields of **1a-1f** were measured at low concentrations in chloroform to minimize the possibility of singlet oxygen quenching by the dyes. Tetraphenylporphyrin (TPP) in chloroform ( $\Phi_{\Delta} = 0.55$ )<sup>2</sup> was used as the reference and

DPBF was used as the singlet oxygen indicator. The photooxidation of DPBF was monitored between 0 s to 4 min depending on the efficiency of the BODIPYs under irradiation (660 nm) at 0.5 W/cm<sup>2</sup>. Singlet oxygen quantum yields were calculated using the following formula (2):<sup>3</sup>

$$\Phi_{\Delta X} = \Phi_{\Delta R} \times \left( \frac{1 - 10^{-A_R^{660}}}{1 - 10^{-A_X^{660}}} \right) \times \left( \frac{S_X}{S_R} \right) \quad (2)$$

The X and R respectively represent our compounds and the known standard reference substance TPP.  $\Phi_{\Delta}$  is the quantum yield of singlet oxygen, S is the slope of a plot of difference in change in absorbance of DPBF (at 415 nm) with the irradiation time and  $(1 - 10^{-A})$  is the absorption correction factor, which is given by the absorbance at the irradiation wavelength.

#### 4. Synthesis of the compounds

*3-(3,5-Bis(trifluoromethyl)phenyl)-1-phenylprop-2-en-1-one (4a)*.<sup>4</sup> To a solution of acetophenone **2a** (1.9 mL, 16.7 mmol, in 50 mL ethanol (EtOH)) was added a solution of sodium hydroxide (NaOH, 41.6 mmol, 5% in water). The mixture was stirred for 3 min, and then 3,5-bis(trifluoromethyl) benzaldehyde **3b** (3.0 mL, 18.3 mmol) was added in one portion. After stirring for 25 min at room temperature, the mixture was neutralized to pH 7 with 2 N hydrochloric acid (HCl). After filtration, the residue was collected, re-dissolved in EtOAc. The solution was dried with anhydrous sodium sulfate (Na<sub>2</sub>SO<sub>4</sub>) and concentrated under vacuum to give the crude product, which was recrystallized from EtOAc and PE to give **4a** as yellowish solid (4.4 g, yield 76%). <sup>1</sup>H NMR (400 MHz, CDCl<sub>3</sub>) δ 8.09-8.00 (m, 4H), 7.90 (s, 1H), 7.83 (d, *J* = 15.8 Hz, 1H), 7.69-7.60 (m, 2H), 7.54 (t, *J* = 7.5 Hz, 2H).

*1-(3,5-Bis(trifluoromethyl)phenyl)-3-phenylprop-2-en-1-one (4b)*.<sup>4b</sup> **4b** was prepared as yellowish solid in a 63% yield (8.5 g) from 3,5-bis(trifluoromethyl) acetophenone **2b** (7.0 mL, 39.0 mmol) and benzaldehyde **3a** (4.4 mL, 42.9 mmol) using the same procedure for **4a** except that the reaction was carried out in ice bath and the reaction time was reduced to 8 min. <sup>1</sup>H NMR (600 MHz, CDCl<sub>3</sub>) δ 8.44 (s, 2H), 8.09 (s, 1H), 7.92 (d, *J* = 15.6 Hz, 1H), 7.69 (dd, *J* = 7.2, 2.0 Hz, 2H), 7.51 (d, *J* = 15.6 Hz, 1H), 7.49-7.44 (m, 3H).

*Chalcone (4c)*.<sup>4b,5</sup> **4c** was prepared as yellowish solid in a 73% yield (8.6 g) from acetophenone **2a** (4.9 mL, 41.6 mmol) and benzaldehyde **3a** (4.3 mL, 41.6 mmol) using the same procedure for **4a** except that the reaction time was extended to 20 h. <sup>1</sup>H NMR (400 MHz, CDCl<sub>3</sub>) δ 8.06-7.99 (m, 2H), 7.82 (d, *J* = 15.7 Hz, 1H), 7.68-7.62 (m, 2H), 7.62-7.47 (m, 4H), 7.46-7.40 (m, 3H).

*3-(3,5-Bis(trifluoromethyl)phenyl)-1-(4-methoxy-phenyl)prop-2-en-1-one (4d)*.<sup>6</sup> **4d**

was prepared as yellowish solid in a 89% yield (11.2 g) from 4-methoxy-acetophenone **2c** (5.0 g, 19.5 mmol) and 3,5-bis(trifluoromethyl) benzaldehyde **3b** (5.5 mL, 19.5 mmol) using the same procedure for **4a** except that the reaction time was extended to 12 h. <sup>1</sup>H NMR (400 MHz, CDCl<sub>3</sub>) δ 8.09-8.00 (m, 4H), 7.88 (s, 1H), 7.80 (d, *J* = 15.7 Hz, 1H), 7.66 (d, *J* = 15.7 Hz, 1H), 6.99 (d, *J* = 8.9 Hz, 2H), 3.89 (s, 3H).

*1-(3,5-Bis(trifluoromethyl)phenyl)-3-(4-methoxy phenyl)prop-2-en-1-one (4e)*.<sup>4b,7</sup> **4e** was prepared as yellowish solid in a 31% yield (3.3 g) from 3,5-bis(trifluoromethyl) acetophenone **2b** (3.5 mL, 19.5 mmol) and 4-methoxy-benzaldehyde **3c** (2.4 mL, 19.5 mmol) using the same procedure for **4a**. <sup>1</sup>H NMR (400 MHz, CDCl<sub>3</sub>) δ 8.43 (s, 2H), 8.07 (s, 1H), 7.88 (d, *J* = 15.5 Hz, 1H), 7.64 (d, *J* = 8.8 Hz, 2H), 7.38 (d, *J* = 15.5 Hz, 1H), 6.96 (d, *J* = 8.8 Hz, 2H), 3.87 (s, 3H).

*1,3-Bis(4-methoxyphenyl)prop-2-en-1-one (4f)*.<sup>5</sup> **4f** was prepared as yellowish solid in a 84% yield (4.5 g) from 4-methoxy-acetophenone **2c** (3.0 g, 20.0 mmol) and 4-methoxy-benzaldehyde **3c** (2.7 mL, 22.0 mmol) using the same procedure for **4c** expect that the base was KOH (2.2 g, 39.9 mmol). <sup>1</sup>H NMR (400 MHz, CDCl<sub>3</sub>) δ 8.03 (d, *J* = 8.9 Hz, 2H), 7.78 (d, *J* = 15.6 Hz, 1H), 7.60 (d, *J* = 8.7 Hz, 2H), 7.43 (d, *J* = 15.6 Hz, 1H), 6.97 (d, *J* = 8.9 Hz, 2H), 6.93 (d, *J* = 8.8 Hz, 2H), 3.86 (d, *J* = 13.3 Hz, 6H).

*4-Nitro-1,3-diphenylbutan-1-one (5c)*.<sup>8</sup> **5c** was prepared as yellowish oil in a 77% yield (1.8 g) from **4c** (2.0 g, 4.5 mmol) using the same procedure for **5a**. <sup>1</sup>H NMR (400 MHz, CDCl<sub>3</sub>) δ 7.92 (d, *J* = 7.1 Hz, 2H), 7.58 (t, *J* = 7.4 Hz, 1H), 7.46 (t, *J* = 7.7 Hz, 2H), 7.38-7.25 (m, 5H), 4.84 (dd, *J* = 12.5, 6.6 Hz, 1H), 4.69 (dd, *J* = 12.5, 8.0 Hz, 1H), 4.28-4.17 (m, 1H), 3.54-3.38 (m, 2H).

*1,3-Bis(4-methoxyphenyl)-4-nitrobutan-1-one (5f)*.<sup>9</sup> **5f** was prepared as yellowish oil in 79% yield (194.1 mg) from **4f** (4.4 g, 16.4 mmol) using the same procedure for **5a** except that the base was KOH (184 mg, 3.3 mmol). <sup>1</sup>H NMR (400 MHz, CDCl<sub>3</sub>) δ 7.90

(d,  $J = 9.0$  Hz, 2H), 7.19 (d,  $J = 8.7$  Hz, 2H), 6.92 (d,  $J = 8.9$  Hz, 2H), 6.85 (d,  $J = 8.7$  Hz, 2H), 4.80 (dd,  $J = 12.3, 6.5$  Hz, 1H), 4.63 (dd,  $J = 12.3, 8.2$  Hz, 1H), 4.21-4.11 (m, 1H), 3.86 (s, 3H), 3.77 (s, 3H), 3.42-3.30 (m, 2H).

*BF<sub>2</sub> chelate of N-(3,5-diphenyl-1H-pyrrol-2-yl)-3,5-diphenyl-2H-pyrrol-2-imine (1c).*<sup>10</sup>

**1c** was prepared in a 22% yield (143.5 mg) as brown metal color solid from **5c** (700.9 mg, 2.6 mmol) using the same procedure for **1a** except that the solvent was n-butanol.

<sup>1</sup>H NMR (400 MHz, CDCl<sub>3</sub>)  $\delta$  8.09-8.02 (m, 8H), 7.53-7.42 (m, 12H), 7.04 (s, 2H).

*BF<sub>2</sub> chelate of N-(3,5-bis(4-methoxyphenyl)-1H-pyrrol-2-yl)-3,5-bis(4-methoxyphenyl)-2H-pyrrol-2-imine (1f).*<sup>11</sup> **1f** was prepared in a 28% yield (448.1 mg) as red

metal color solid from **5f** (1.7 g, 5.1 mmol) using the same procedure for **1a**.

<sup>1</sup>H NMR (400 MHz, CDCl<sub>3</sub>)  $\delta$  8.05 (dd,  $J = 8.4, 7.0$  Hz, 8H), 6.99 (dd,  $J = 8.7, 4.0$  Hz, 8H), 6.93 (s, 2H), 3.89 (d,  $J = 5.1$  Hz, 12H).

**5. UV–Vis absorption of 1b in chloroform.**

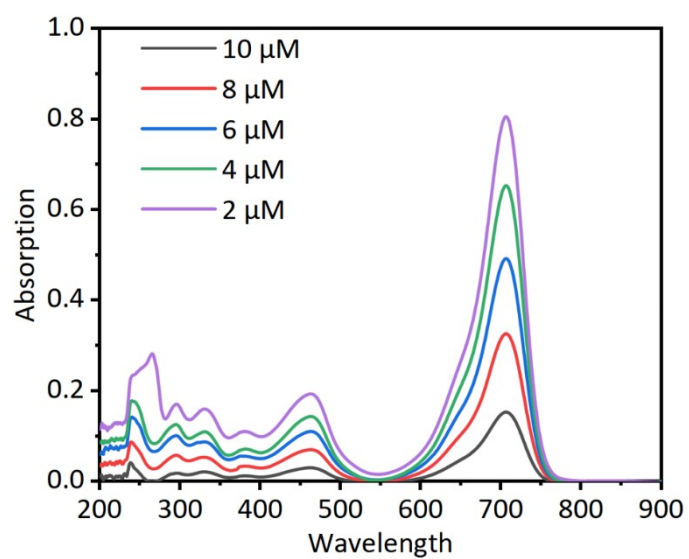

**Fig. S1** UV–Vis absorption of **1b** in chloroform with different concentration (C = 2, 4, 6, 8, 10 μM).

## 6. UV–Vis absorption of DPBF in chloroform.

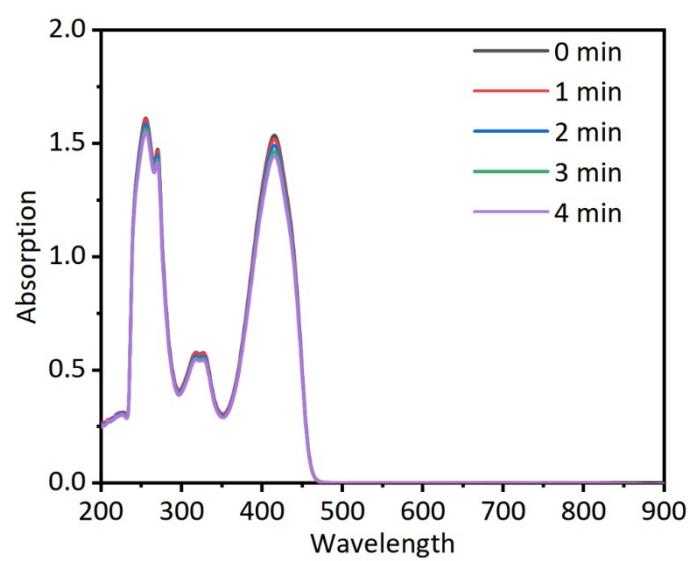

**Fig. S2** UV–Vis absorption of **DPBF** in chloroform under irradiation with different times ( $C = 40 \mu\text{M}$ ,  $660 \text{ nm}$ ,  $0.5 \text{ W/cm}^2$ ).



## 7. Copies of $^1\text{H}$ , $^{13}\text{C}$ , $^{19}\text{F}$ NMR, and HRMS spectra of compounds.

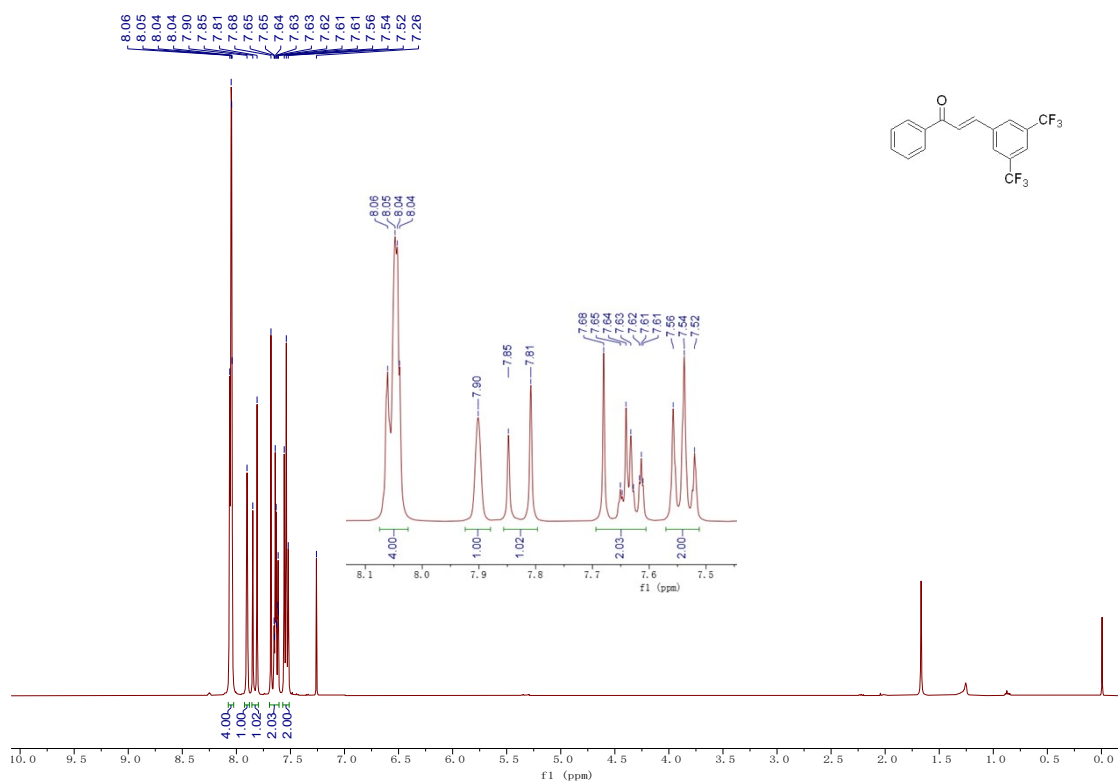

$^1\text{H}$  NMR spectrum of 4a.

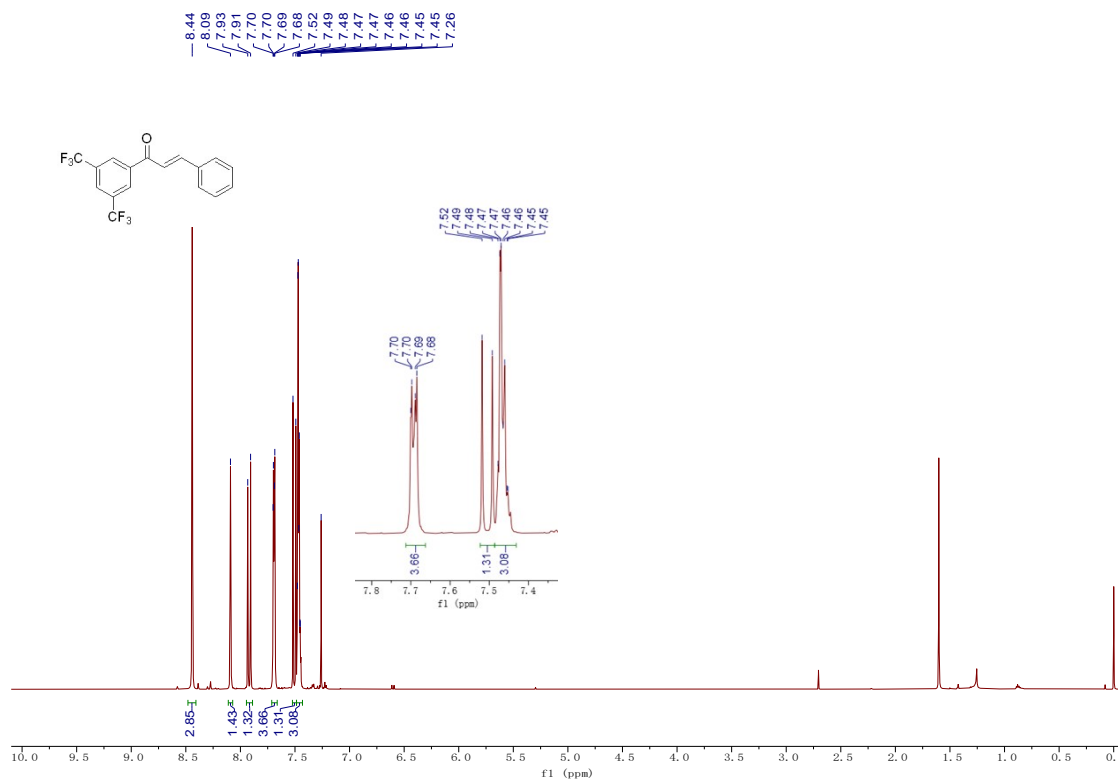

$^1\text{H}$  NMR spectrum of 4b.

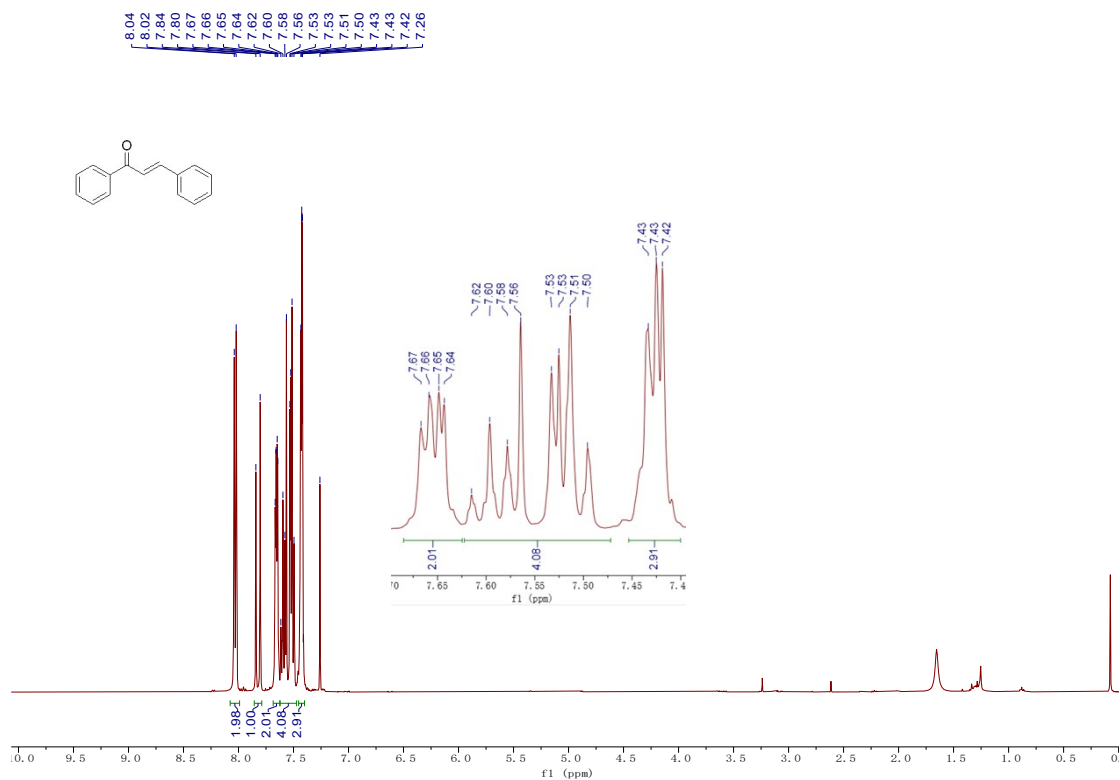

<sup>1</sup>H NMR spectrum of 4c.

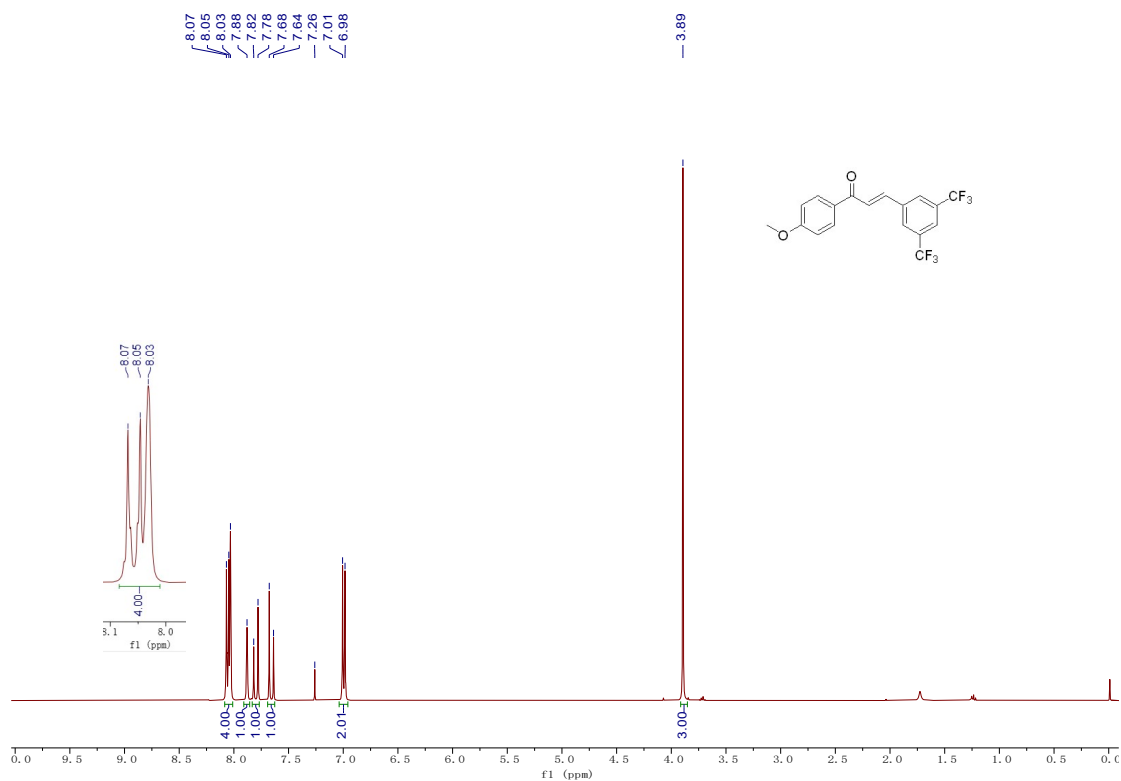

<sup>1</sup>H NMR spectrum of 4d.

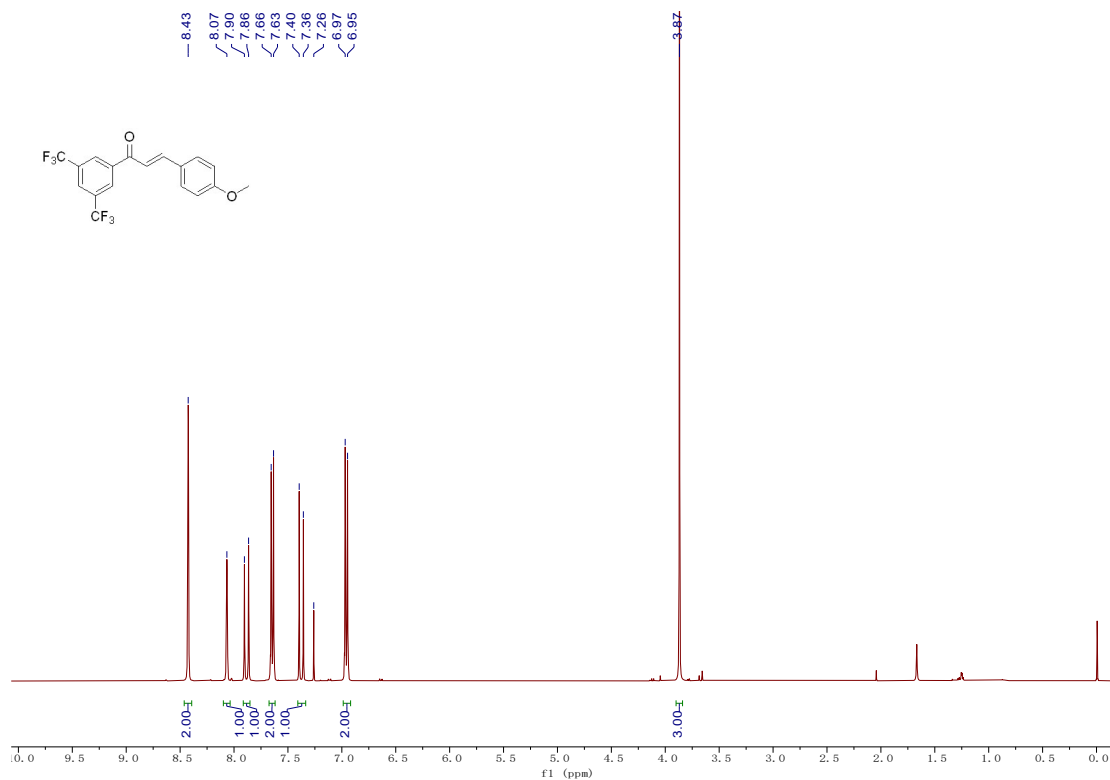

<sup>1</sup>H NMR spectrum of **4e**.

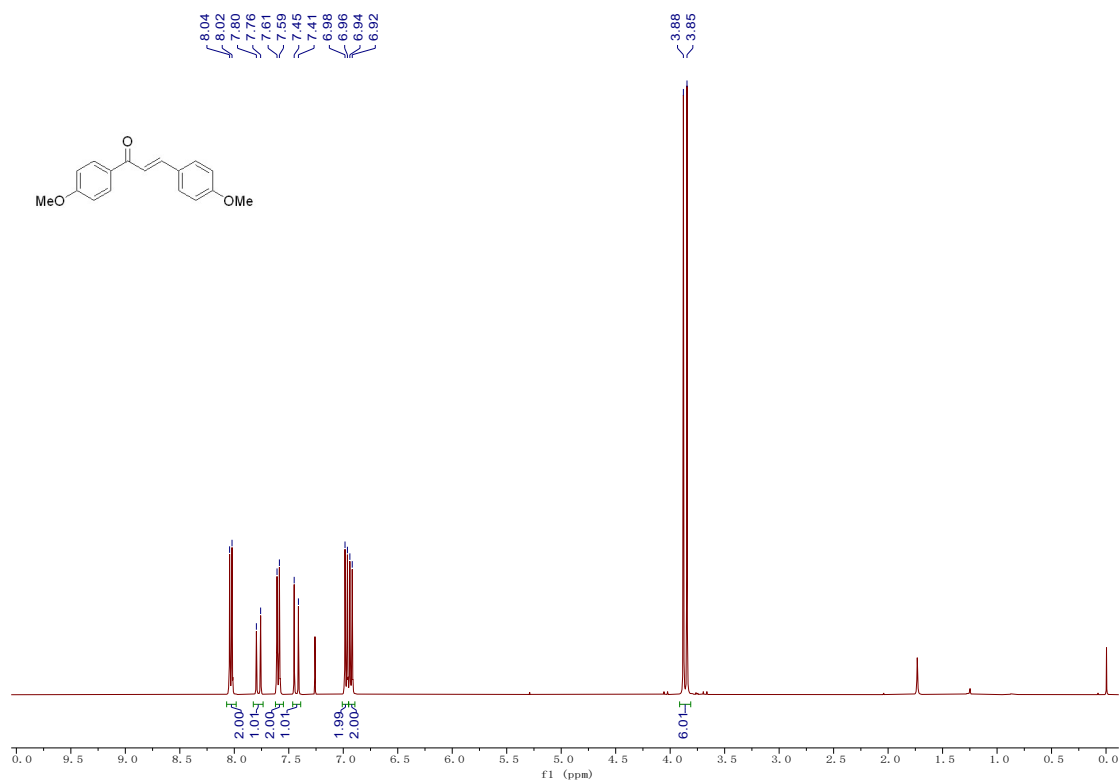

<sup>1</sup>H NMR spectrum of **4f**.

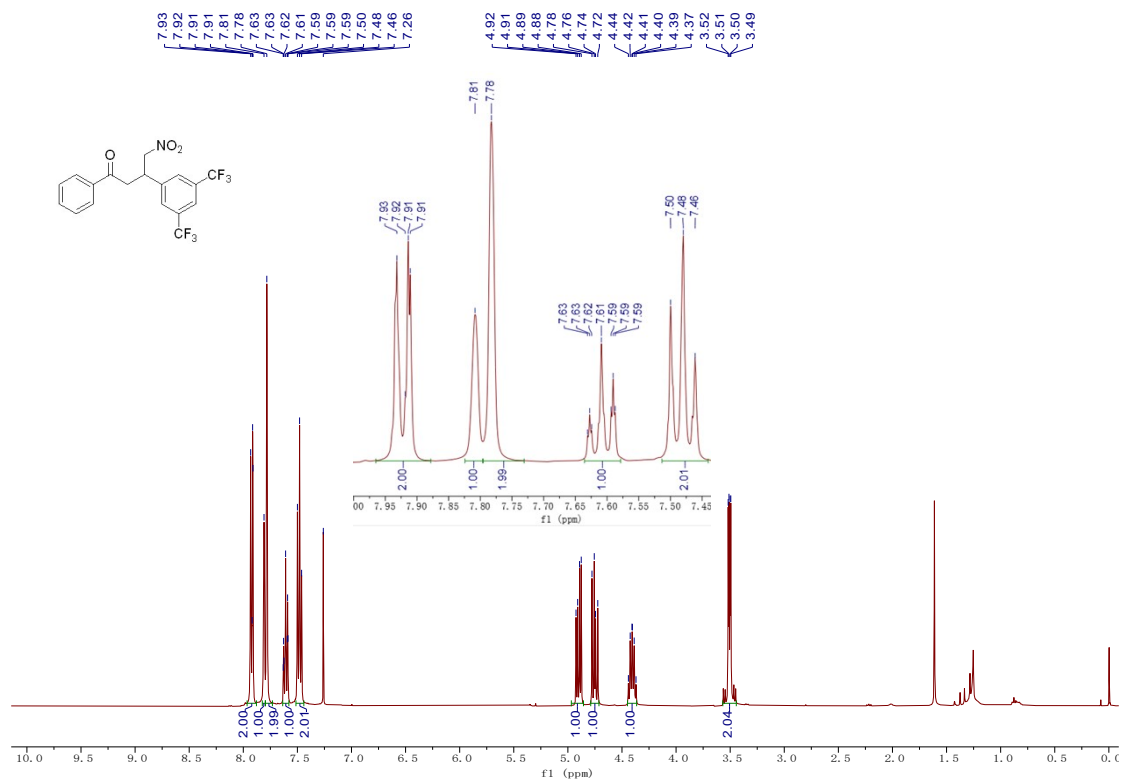

**<sup>1</sup>H NMR spectrum of 5a.**

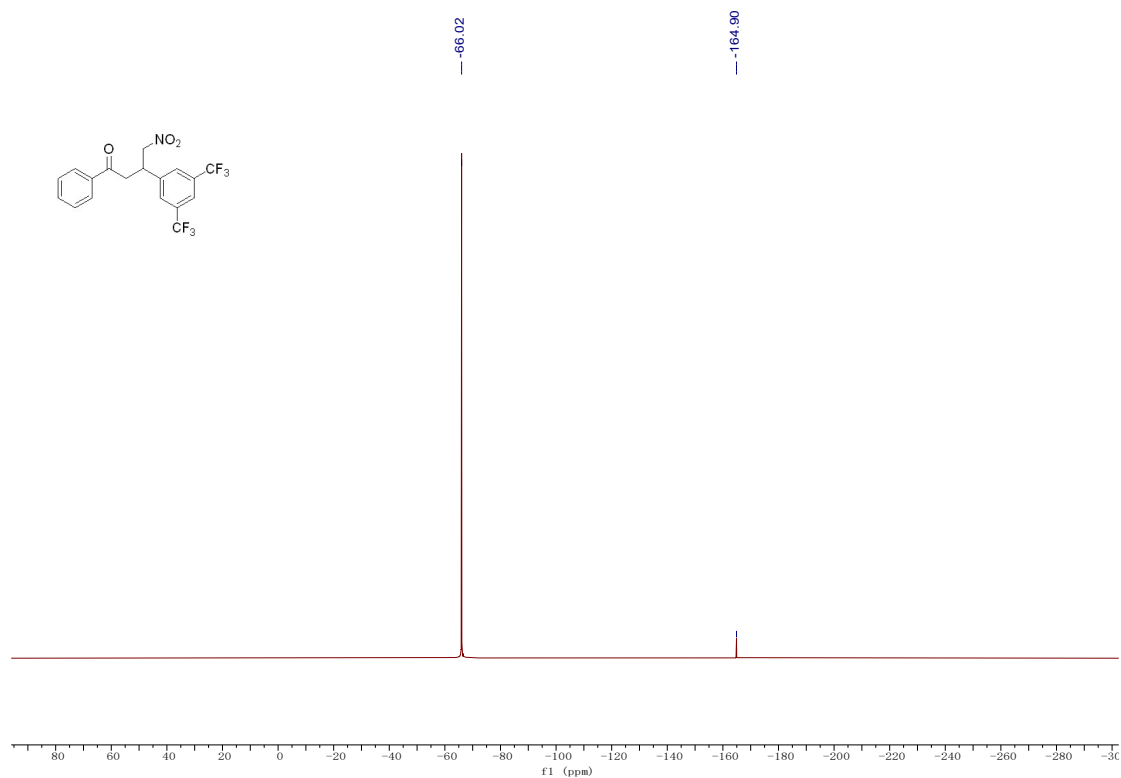

**<sup>19</sup>F NMR spectrum of 5a.**

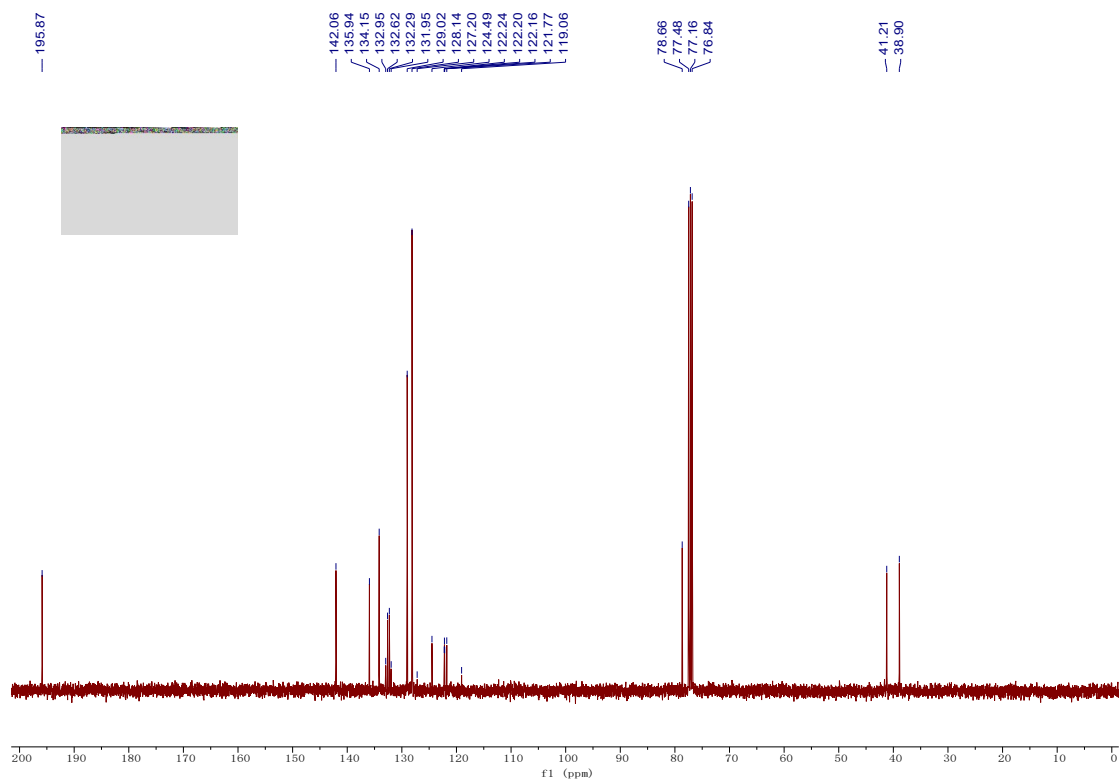

$^{13}\text{C}$  NMR spectrum of **5a**.

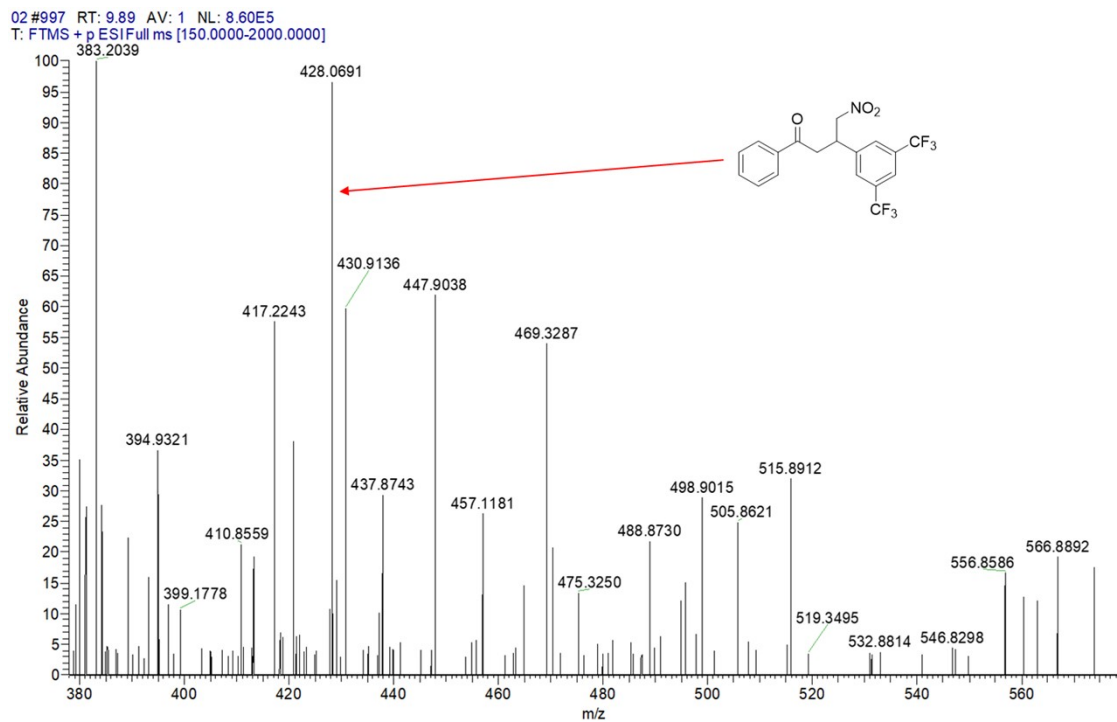

HRMS (ESI) spectrum of **5a**.

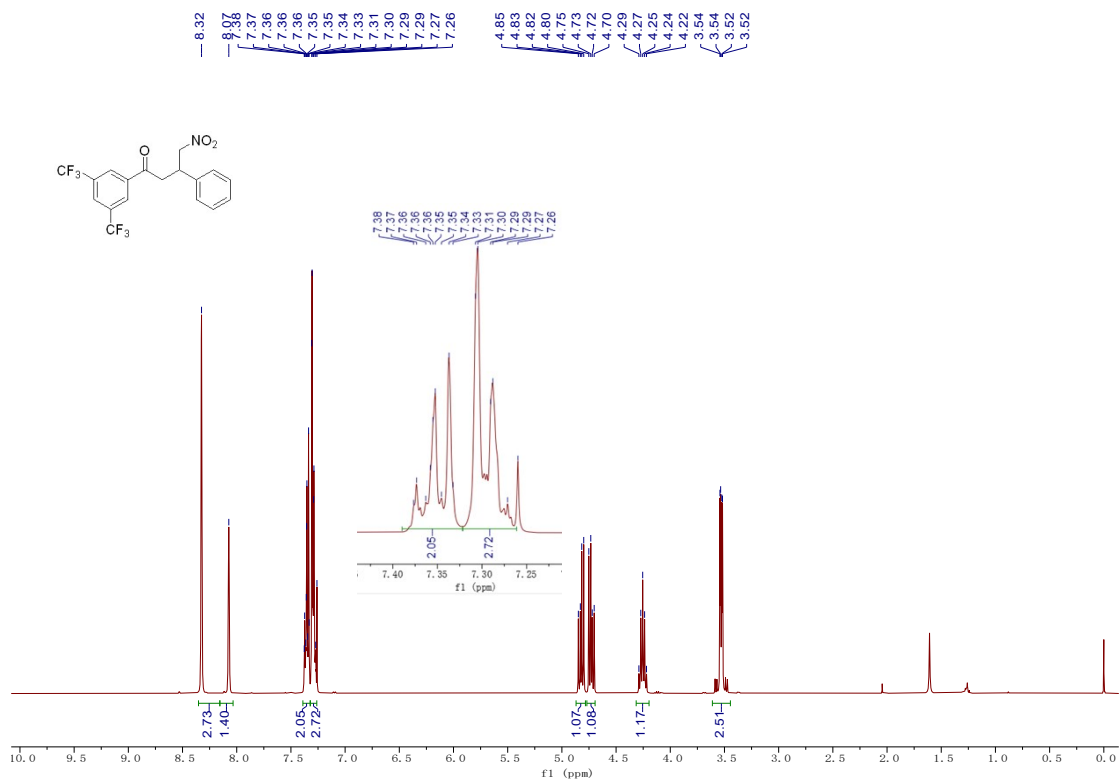

$^1\text{H}$  NMR spectrum of **5b**.

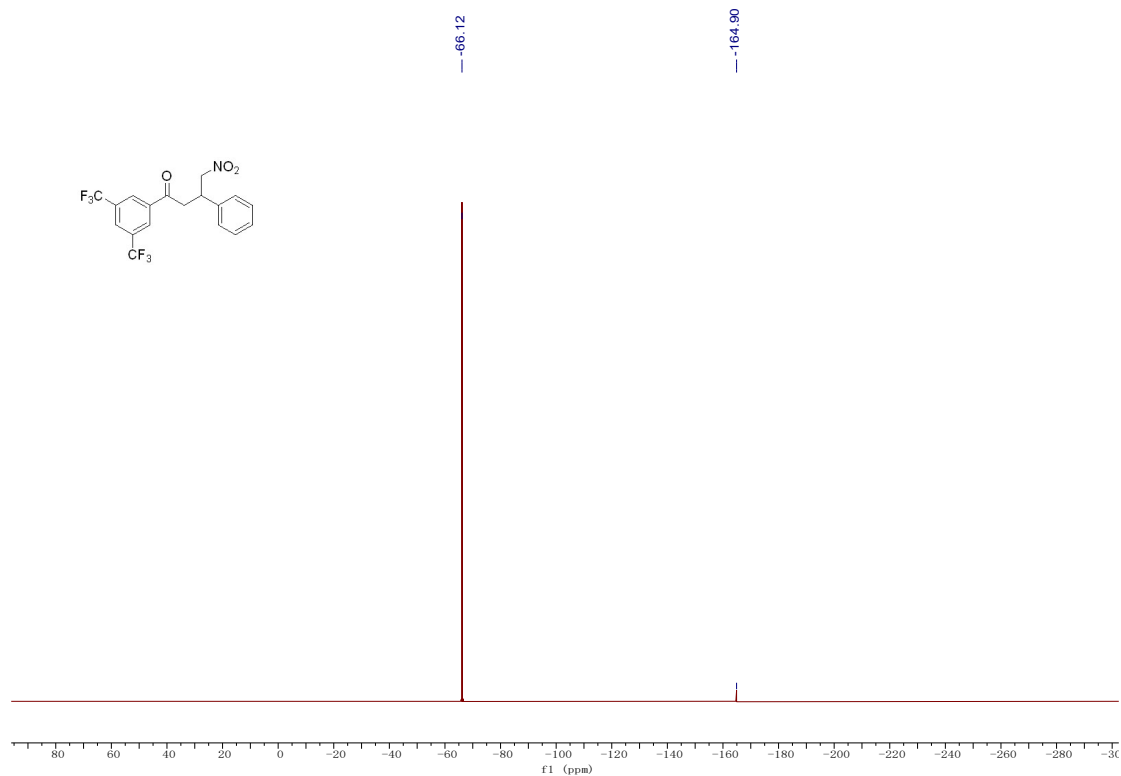

$^{19}\text{F}$  NMR spectrum of **5b**.

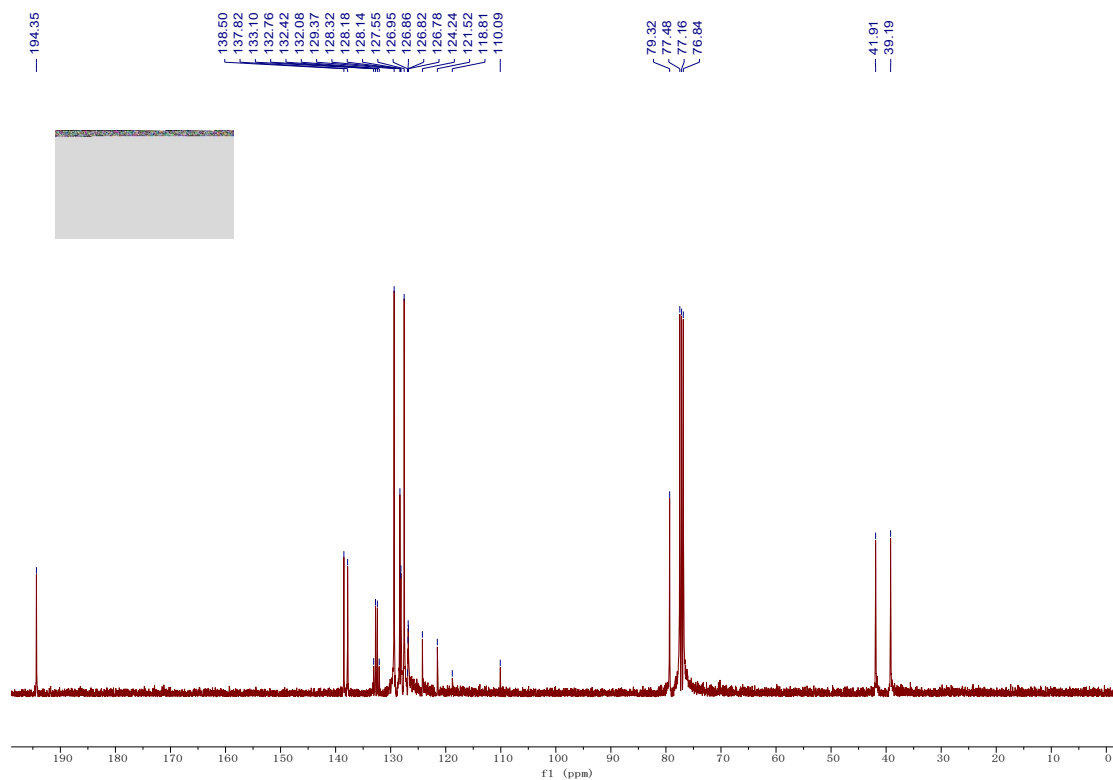

<sup>13</sup>C NMR spectrum of **5b**.

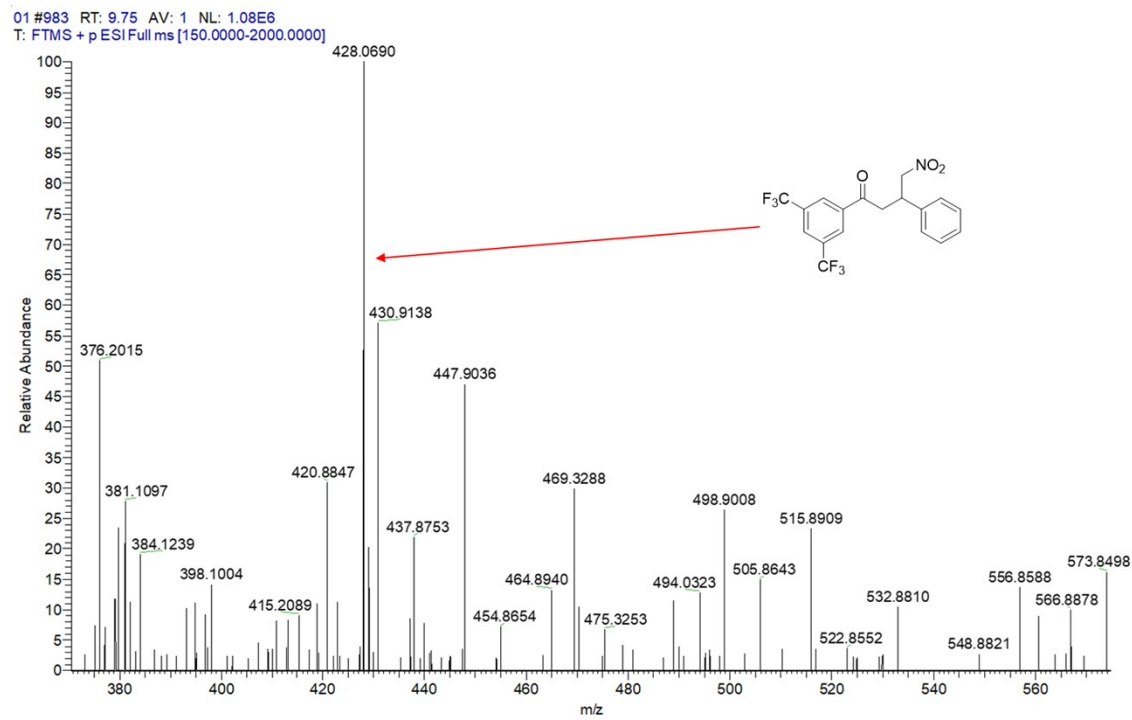

HRMS (ESI) spectrum of **5b**.

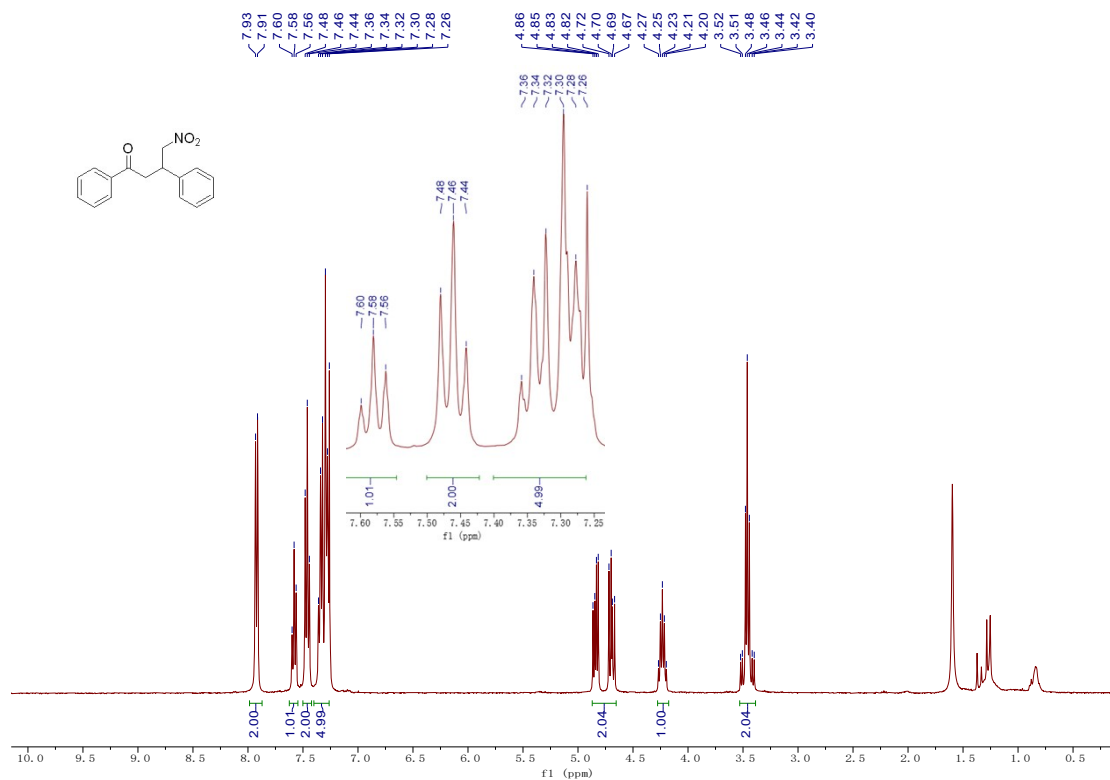

<sup>1</sup>H NMR spectrum of **5c**.

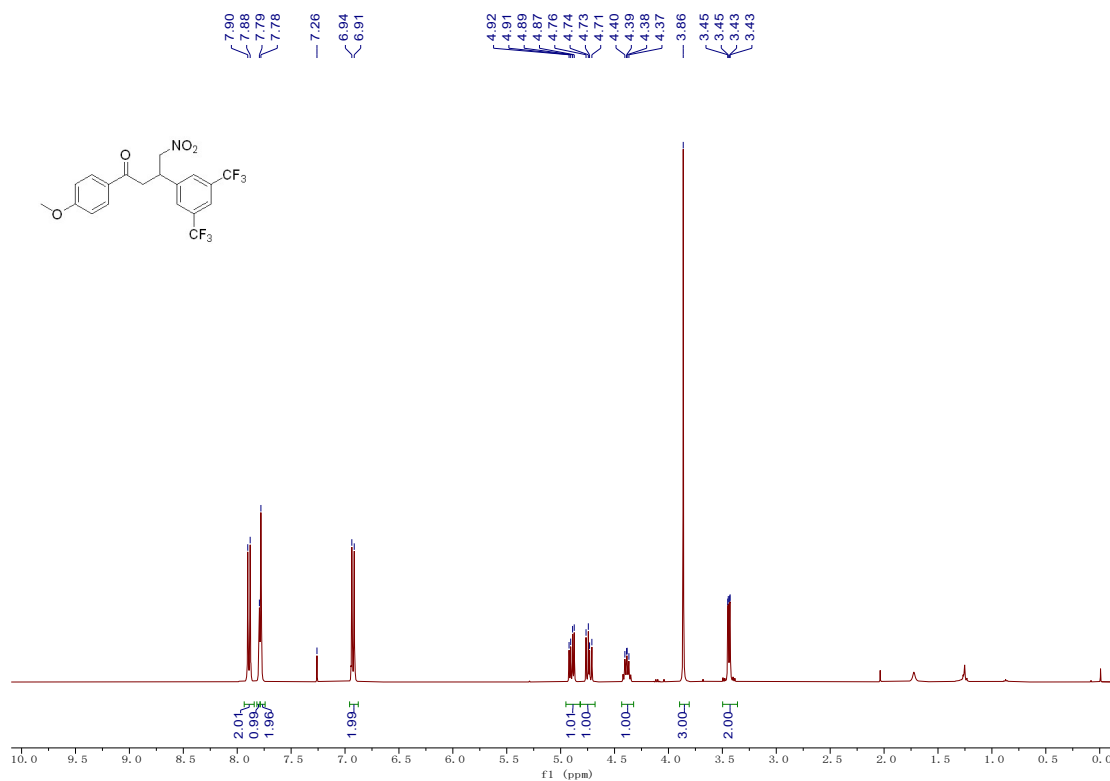

<sup>1</sup>H NMR spectrum of **5d**.



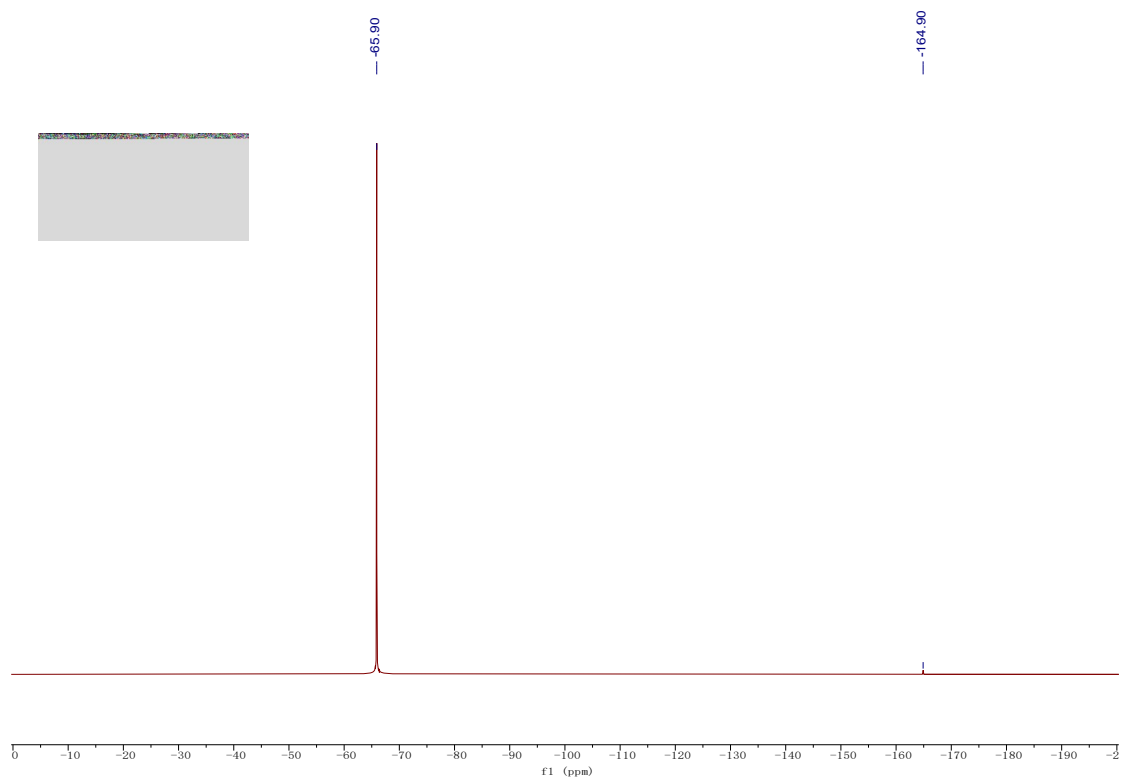

$^{19}\text{F}$  NMR spectrum of **5d**.

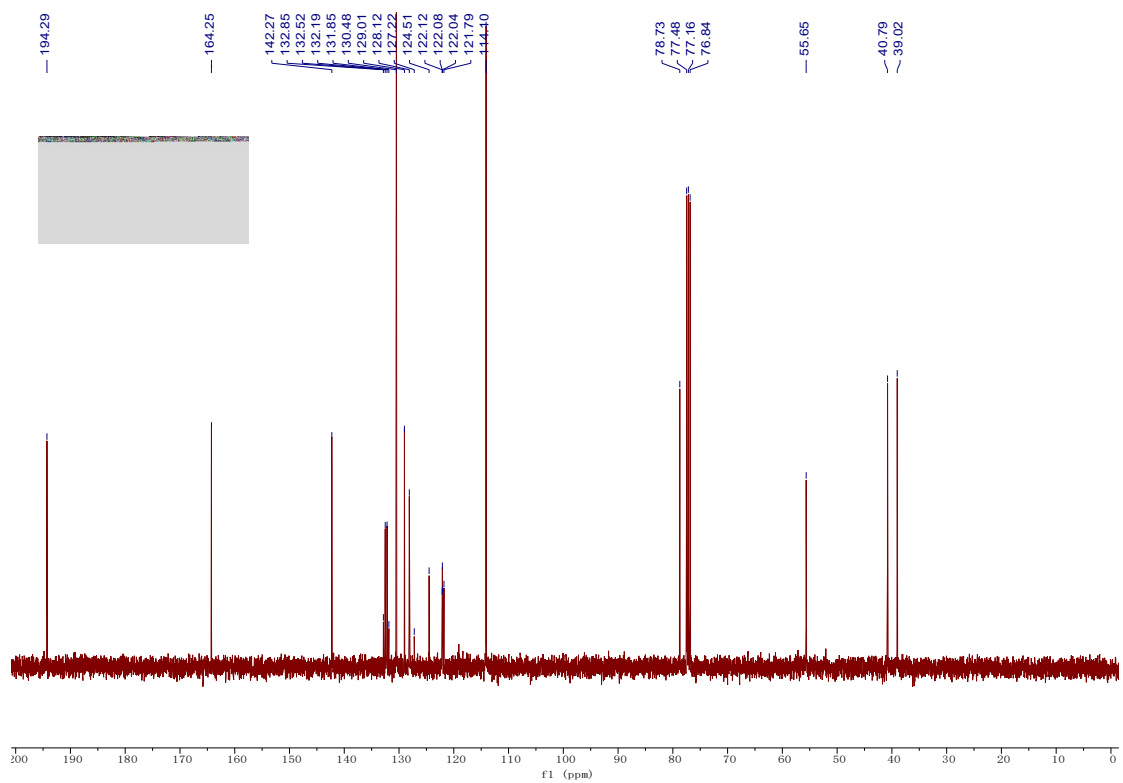

$^{13}\text{C}$  NMR spectrum of **5d**.

03 #969 RT: 9.62 AV: 1 NL: 2.43E7  
T: FTMS + p ESI Full ms [150.0000-2000.0000]

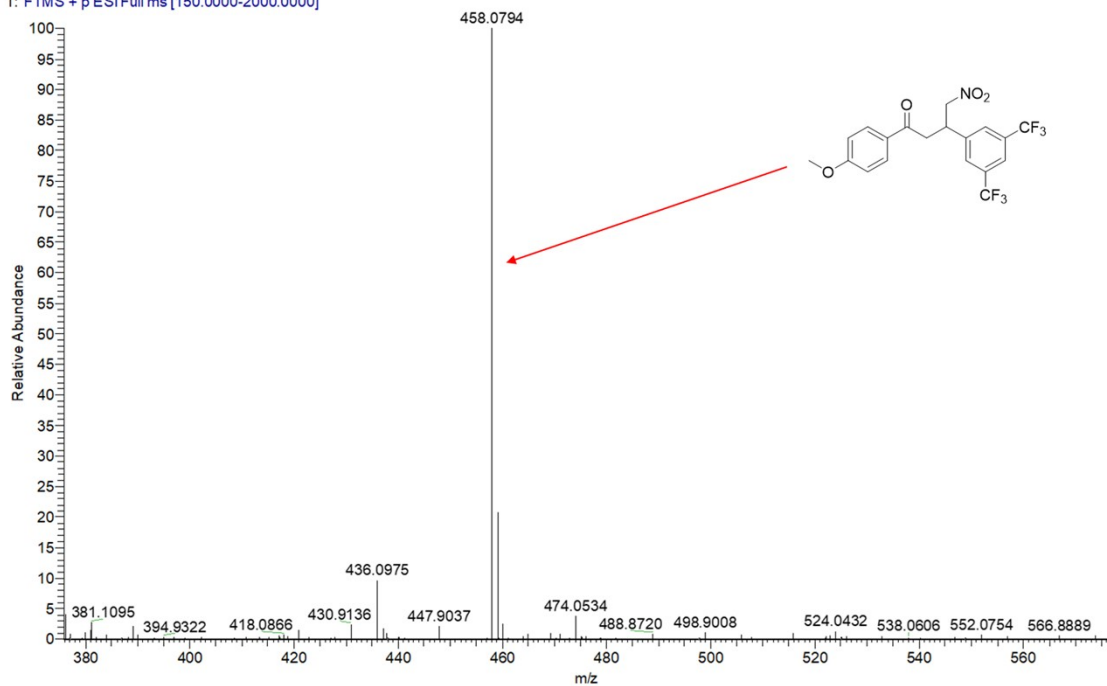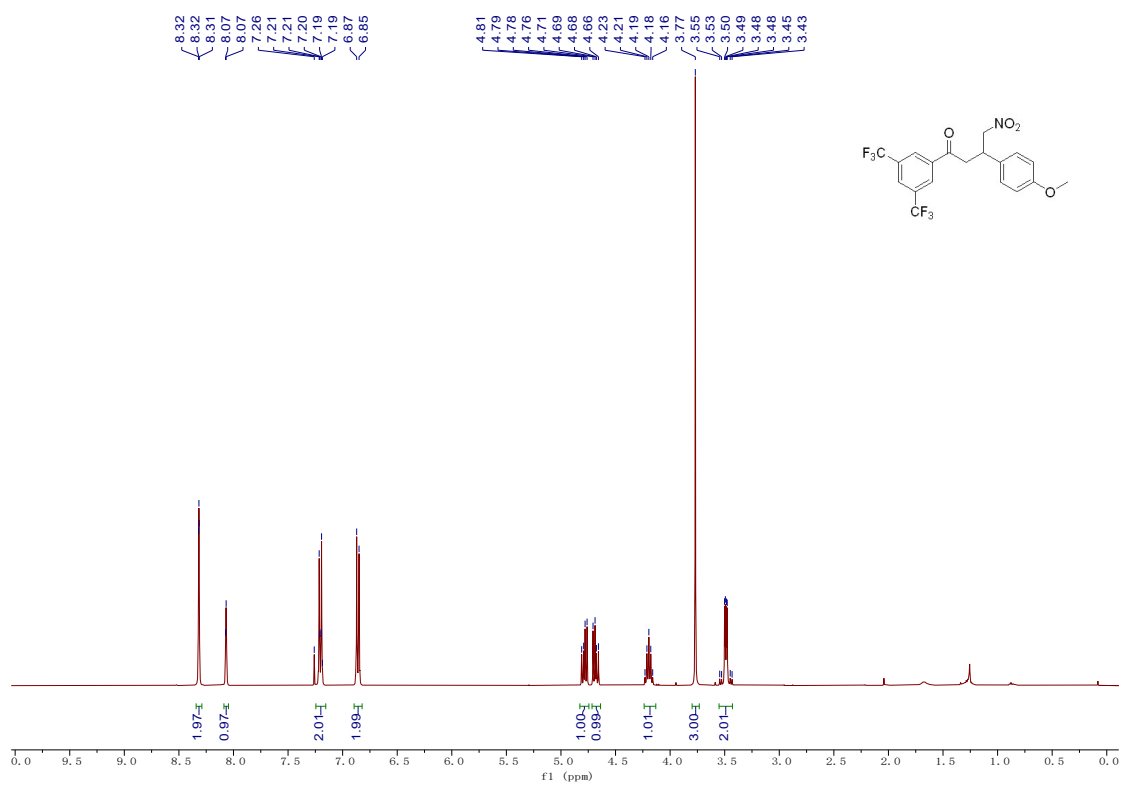

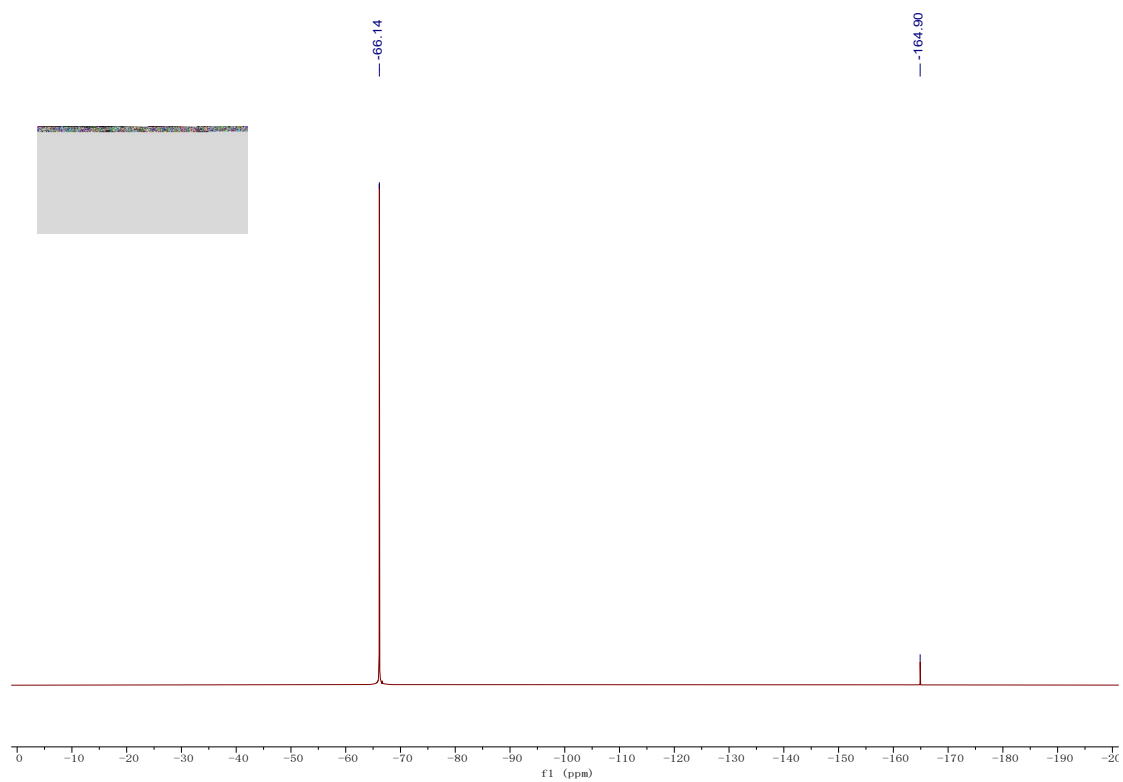

$^{19}\text{F}$  NMR spectrum of **5e**.

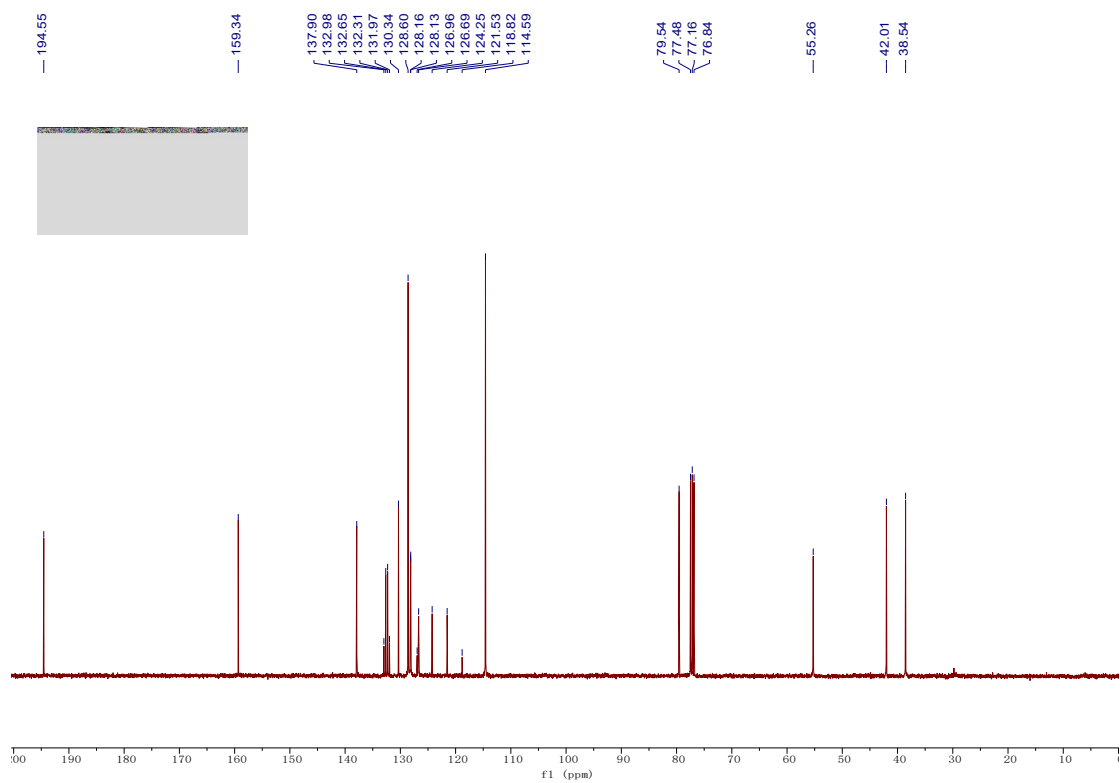

$^{13}\text{C}$  NMR spectrum of **5e**.

04 #981 RT: 9.74 AV: 1 NL: 6.99E6  
T: FTMS + p ESI Full ms [150.0000-2000.0000]

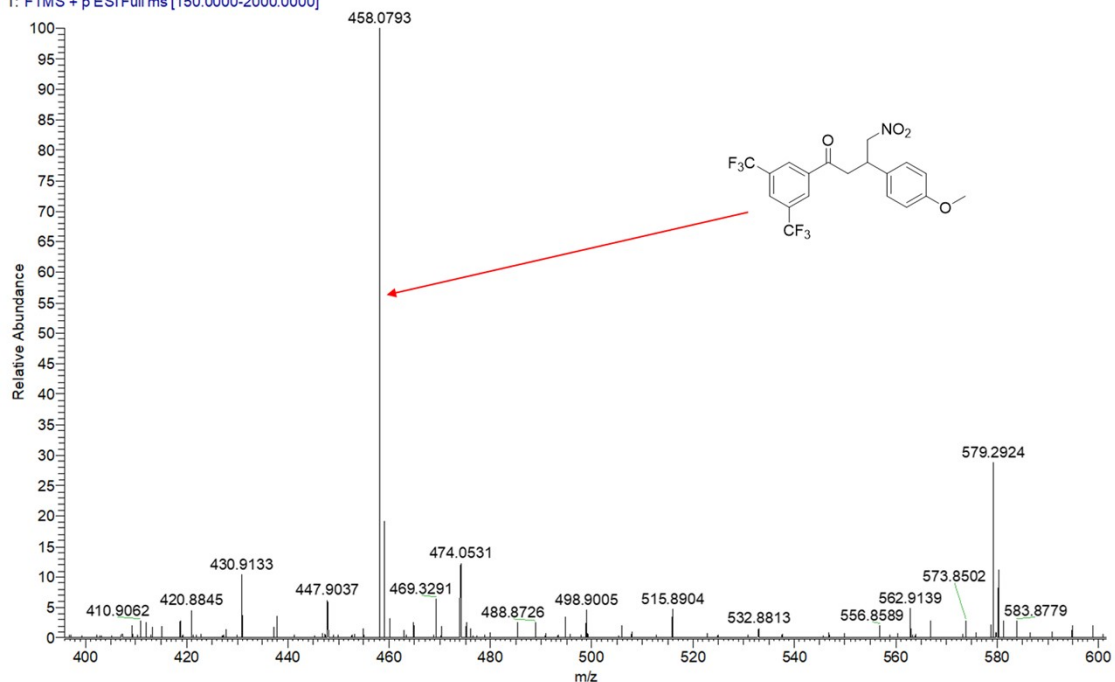

HRMS (ESI) spectrum of **5e**.

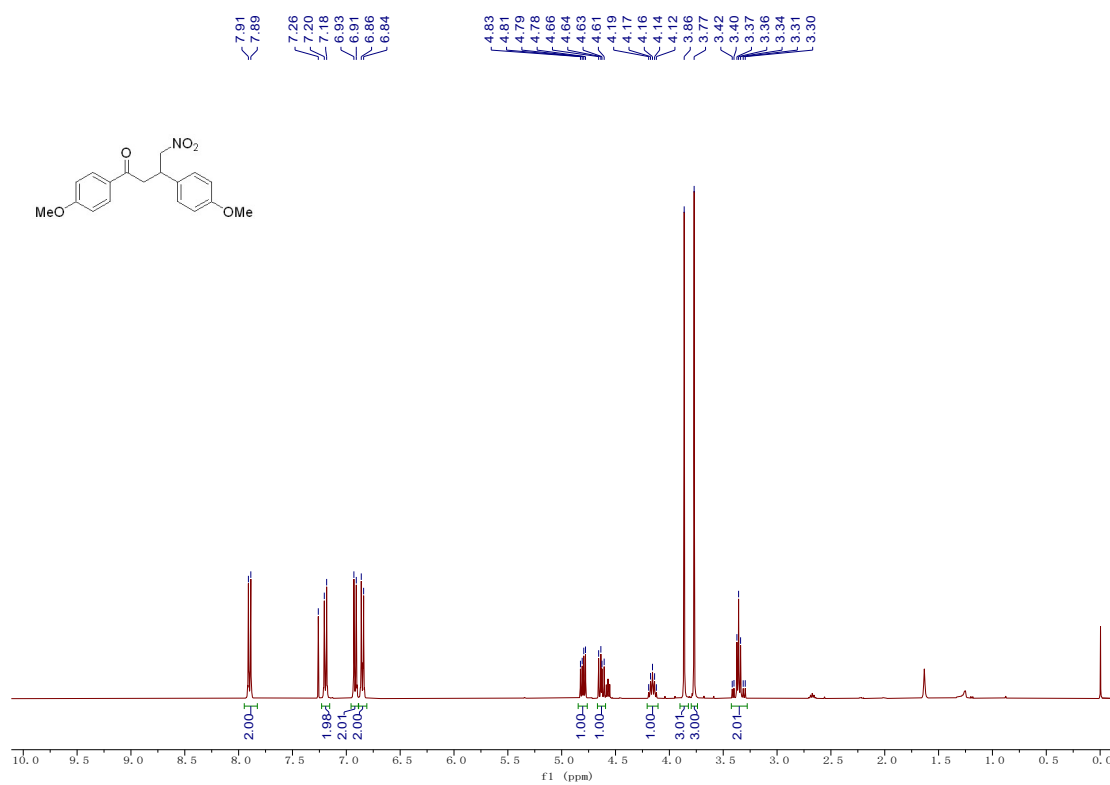

<sup>1</sup>H NMR spectrum of **5f**.

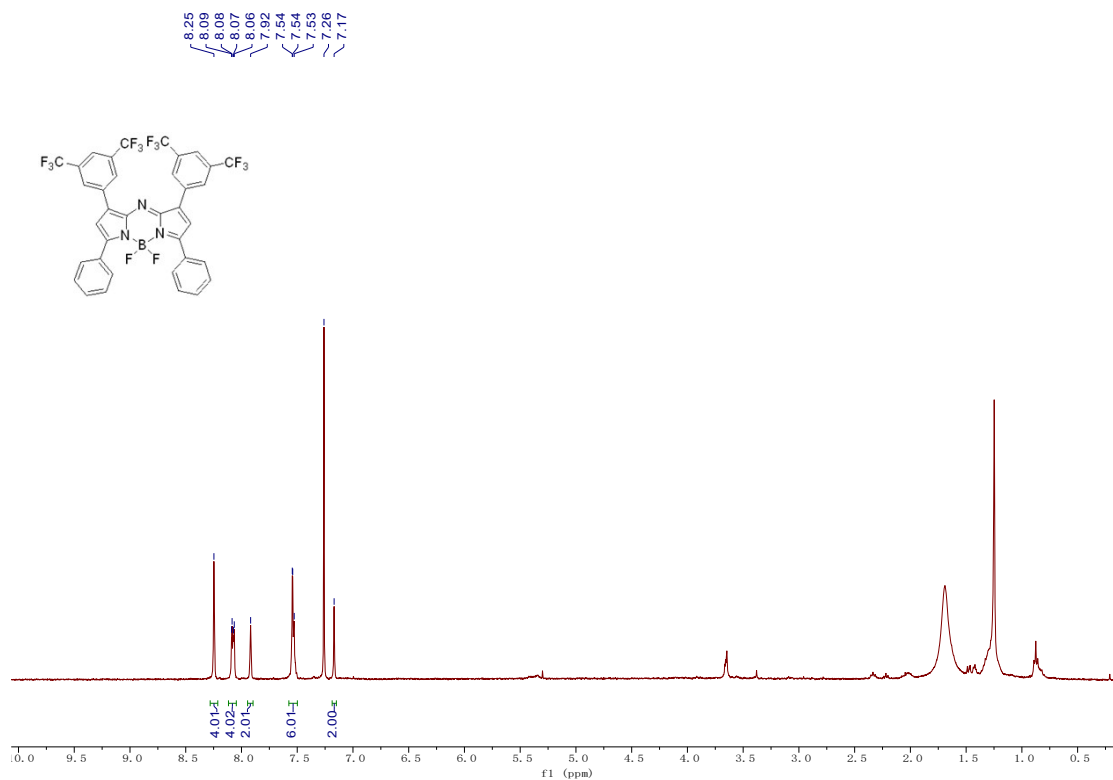

<sup>1</sup>H NMR spectrum of **1a**.

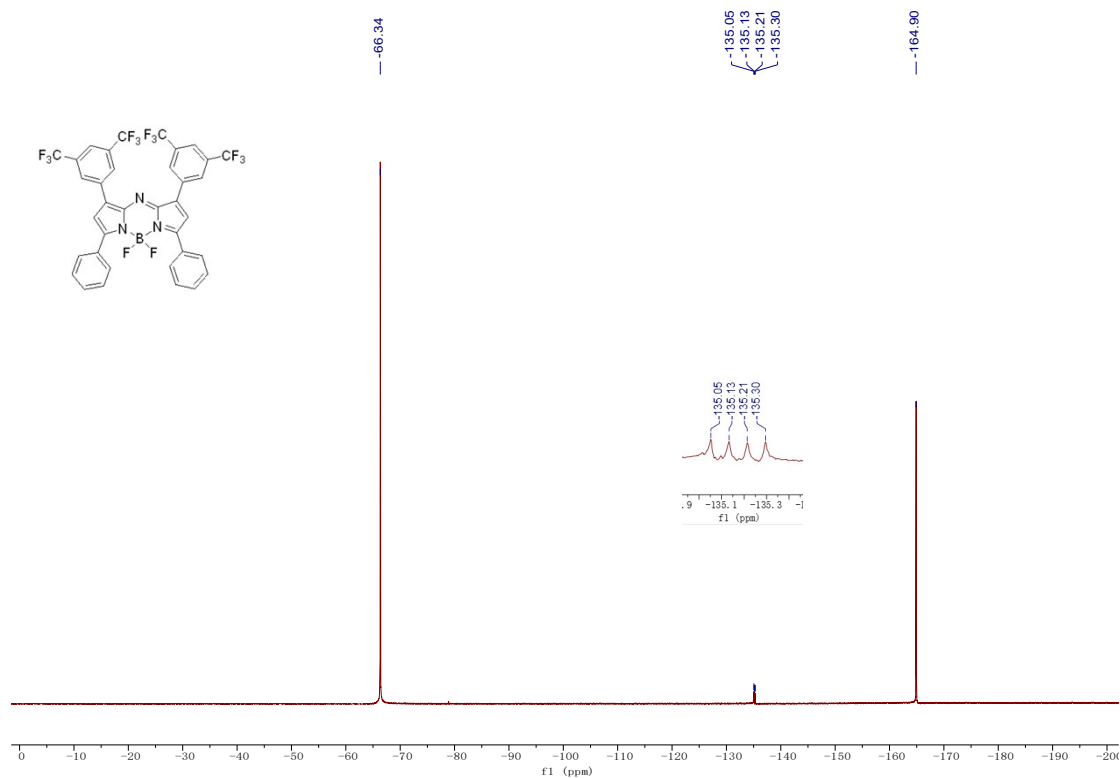

<sup>19</sup>F NMR spectrum of **1a**.

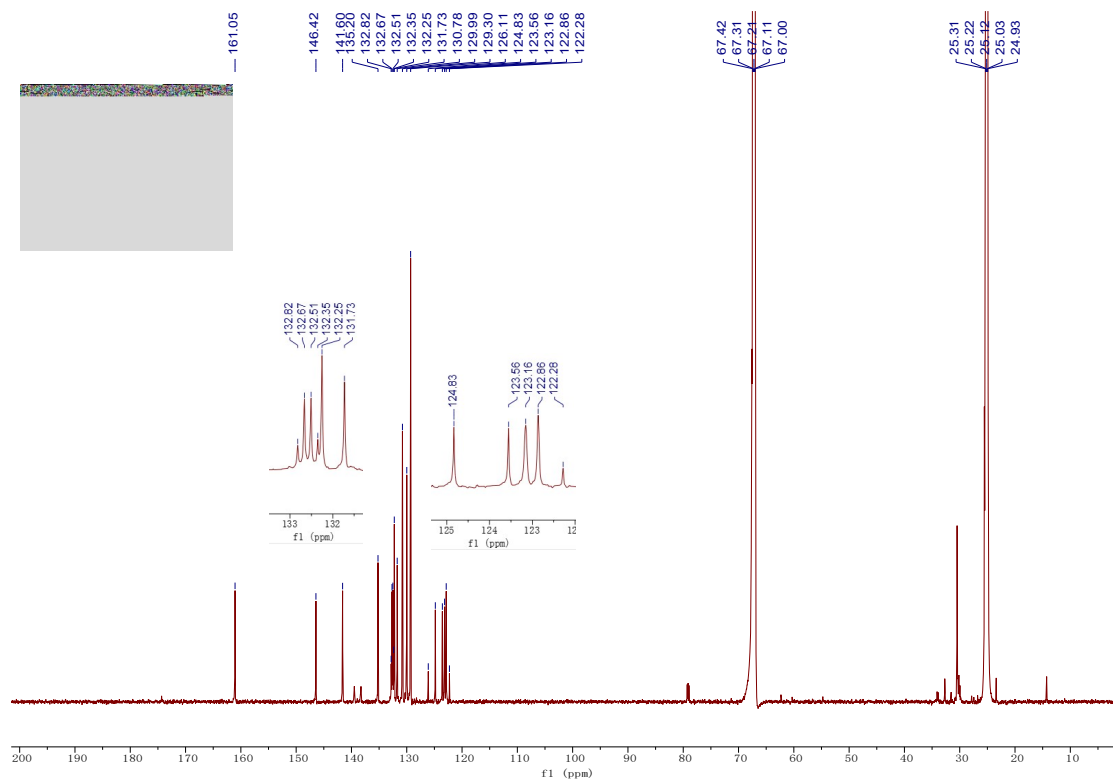

$^{13}\text{C}$  NMR spectrum of **1a**.

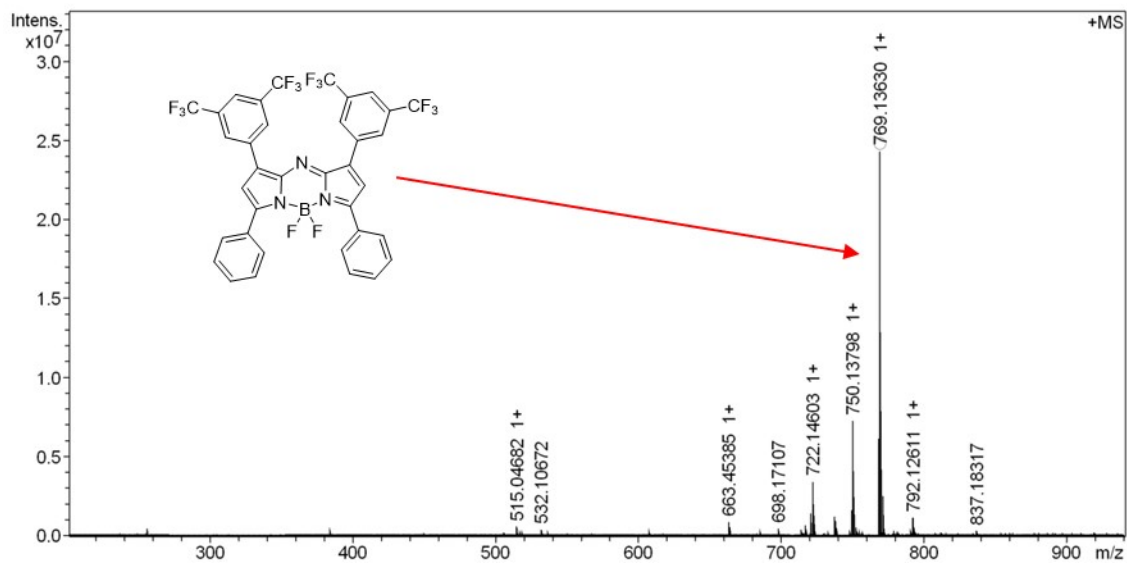

HRMS (MALDI-TOF) spectrum of **1a**.

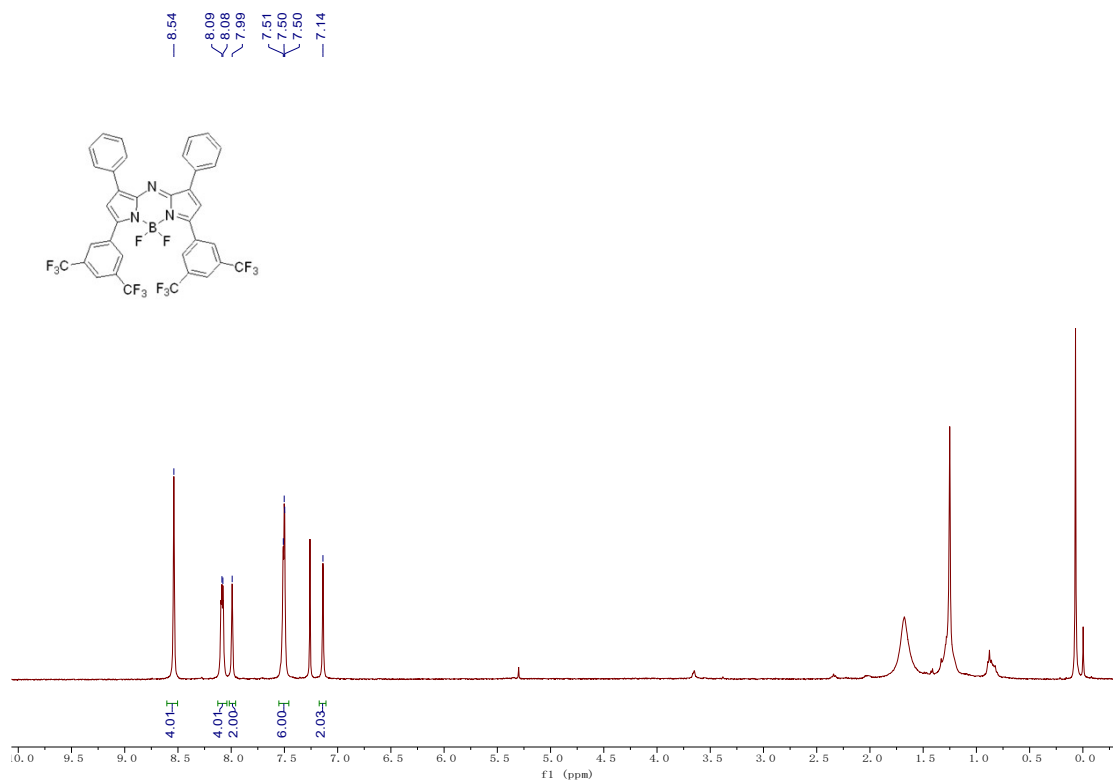

$^1\text{H}$  NMR spectrum of **1b**.

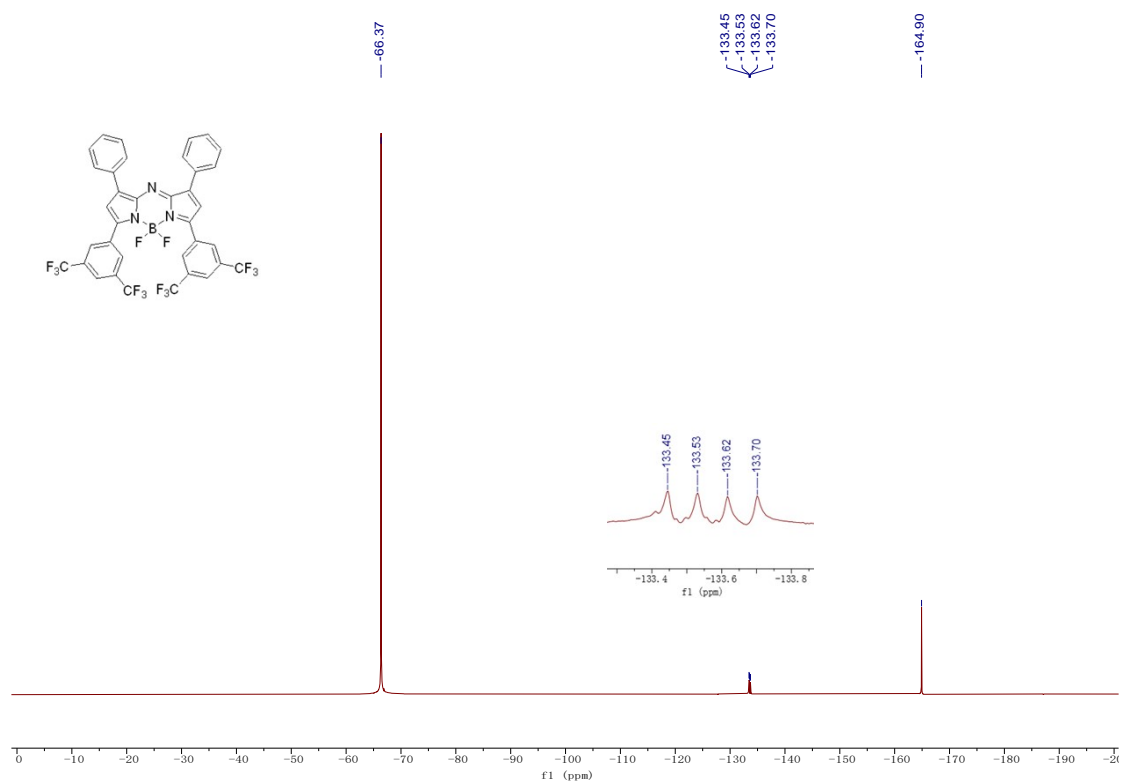

$^{19}\text{F}$  NMR spectrum of **1b**.

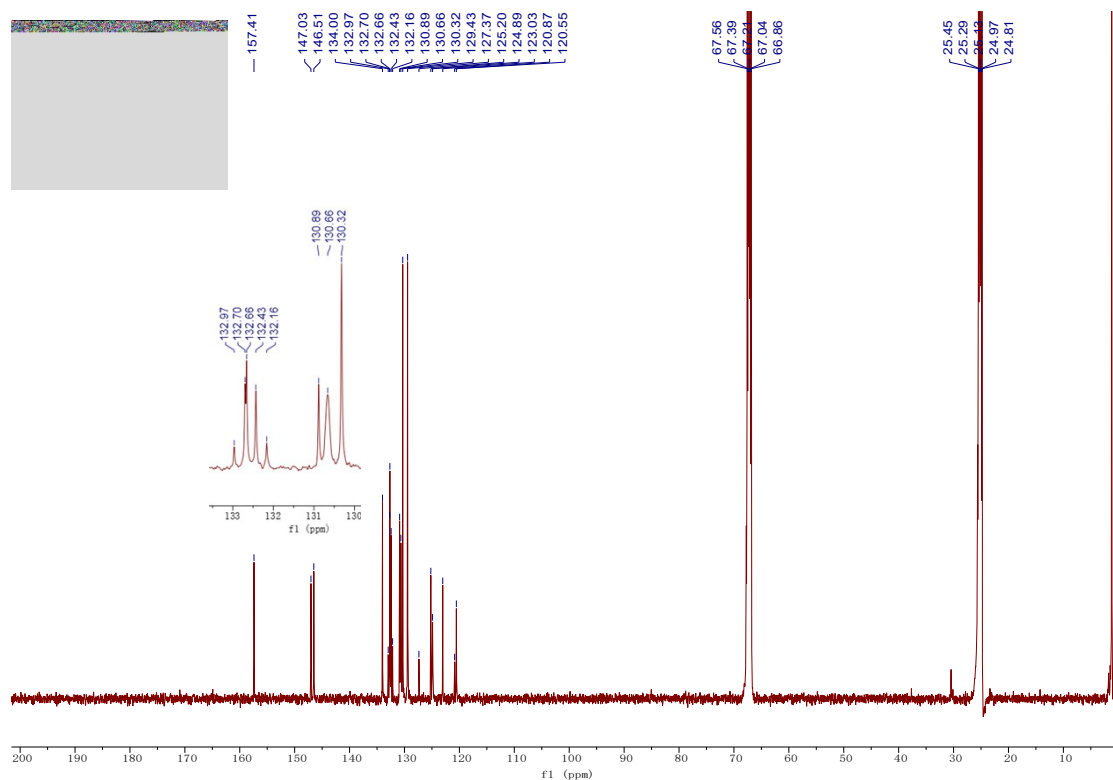

$^{13}\text{C}$  NMR spectrum of **1b**.

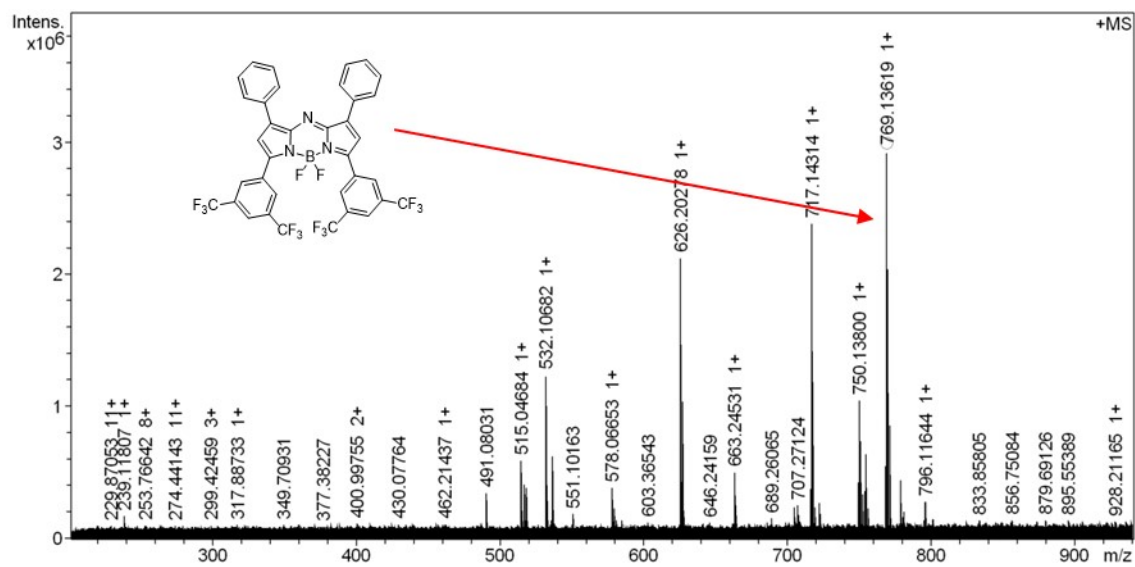

HRMS (MALDI-TOF) spectrum of **1b**.



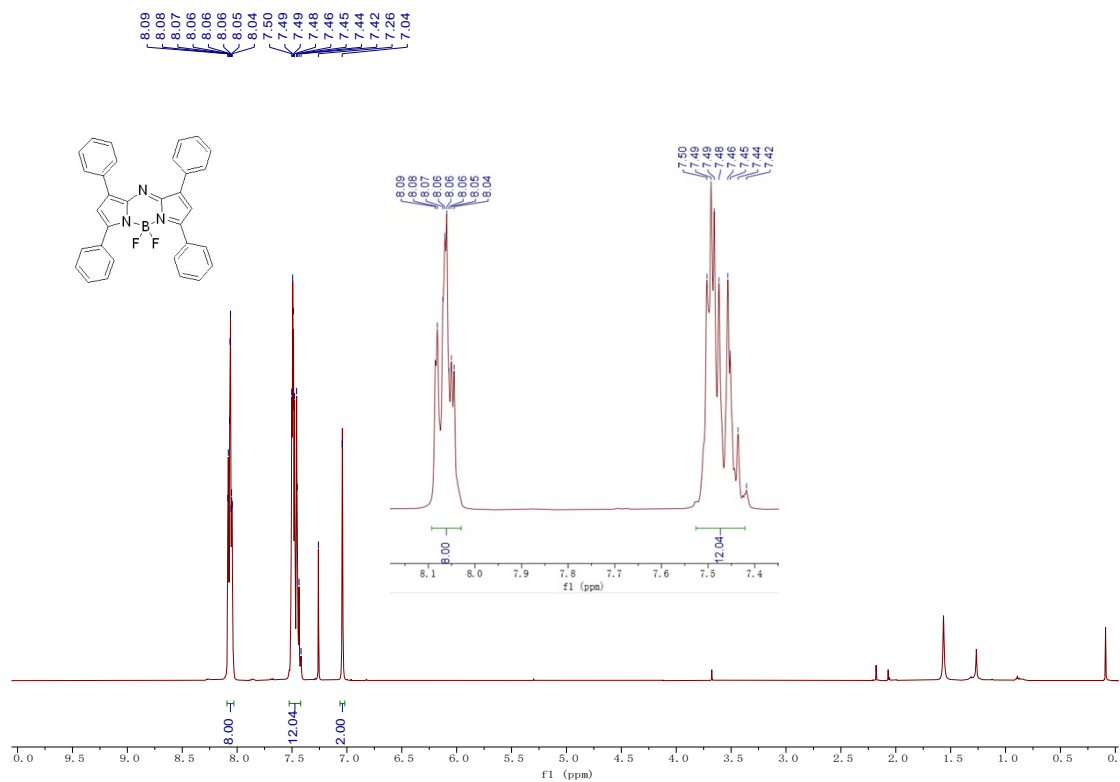

$^1\text{H}$  NMR spectrum of **1c**.

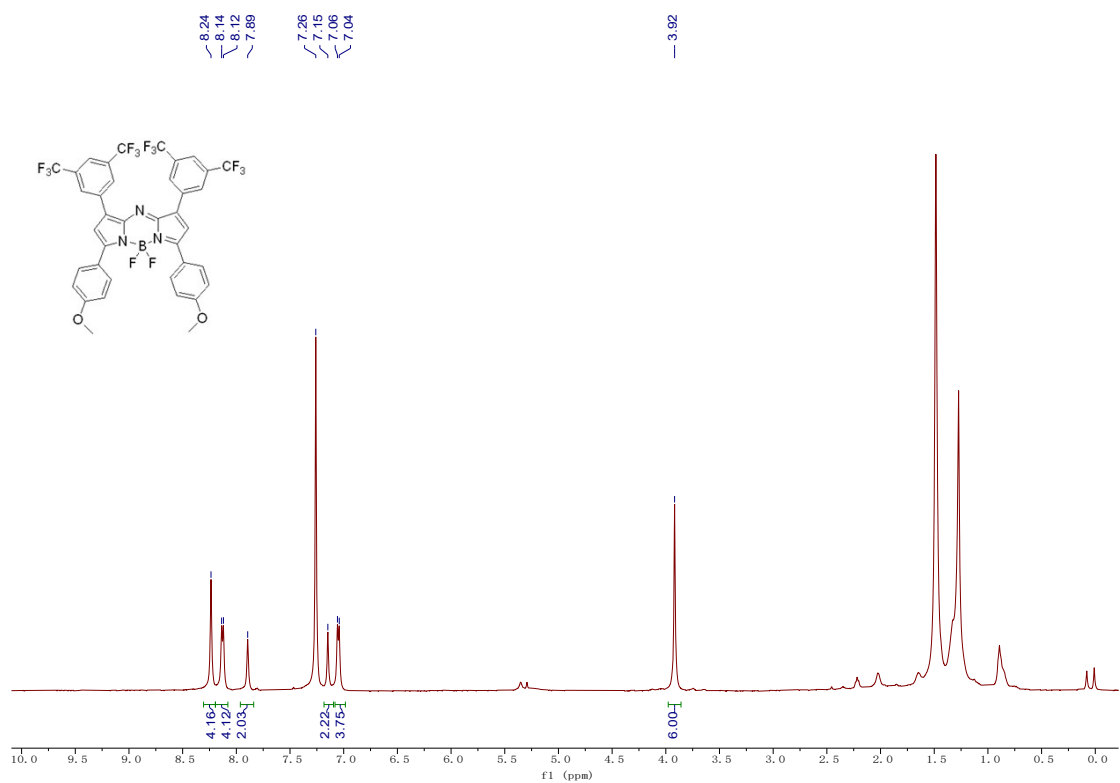

$^1\text{H}$  NMR spectrum of **1d**.

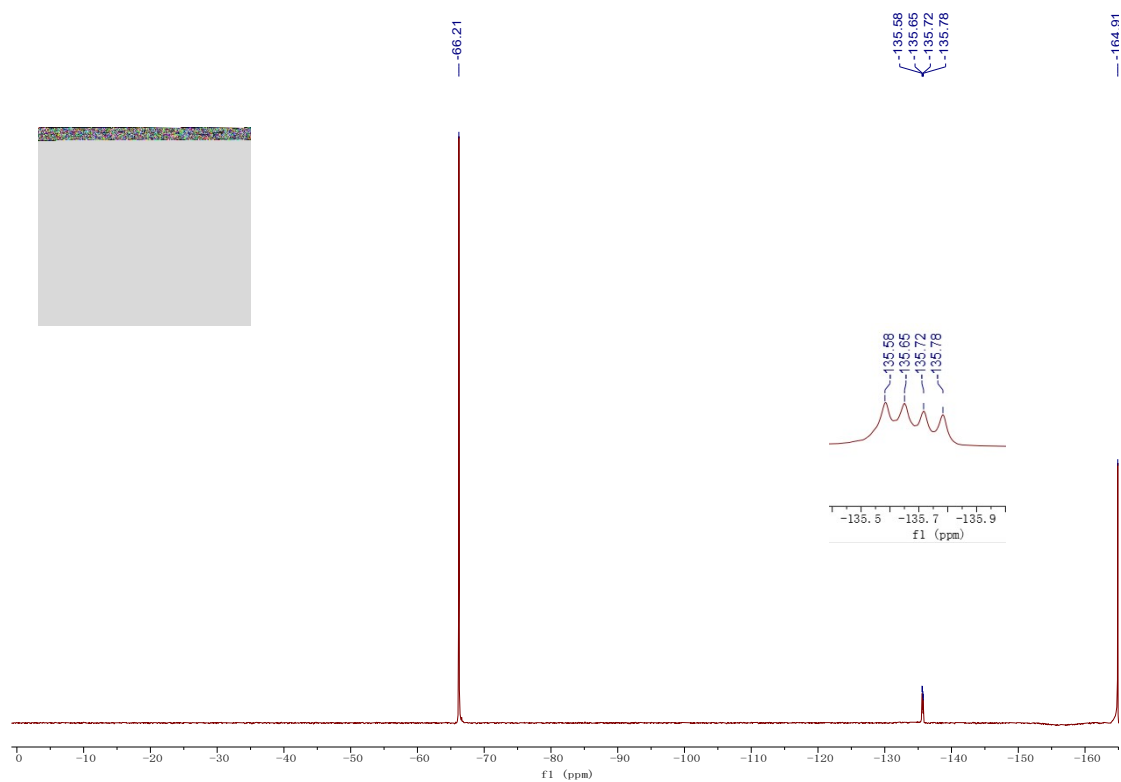

$^{19}\text{F}$  NMR spectrum of **1d**.

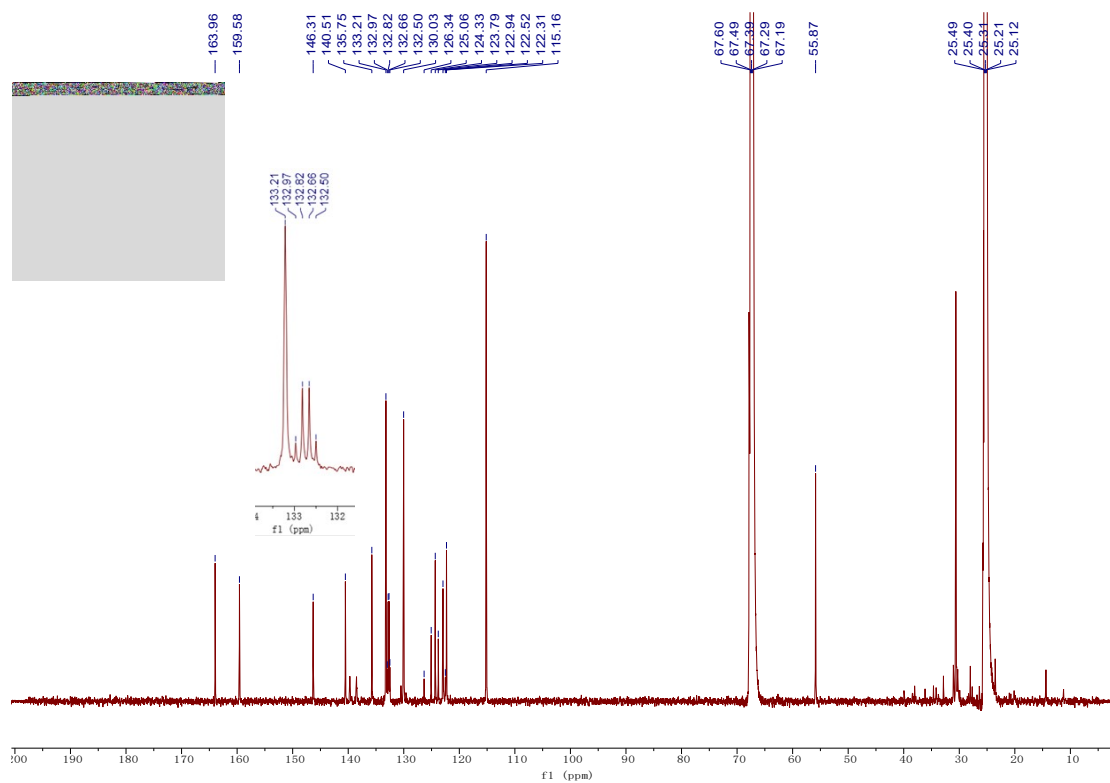

$^{13}\text{C}$  NMR spectrum of **1d**.

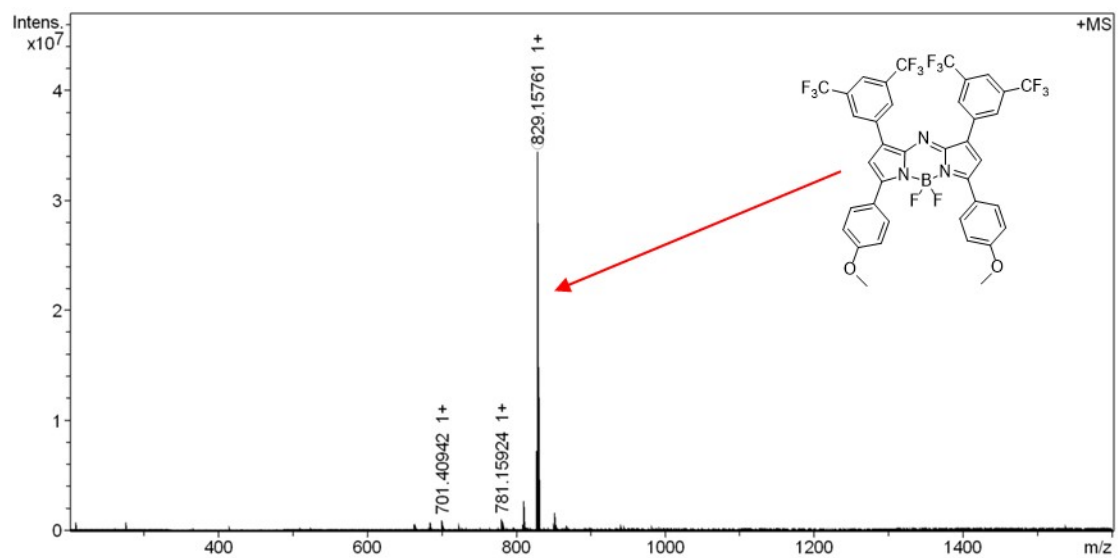

HRMS (MALDI-TOF) spectrum of **1d**.

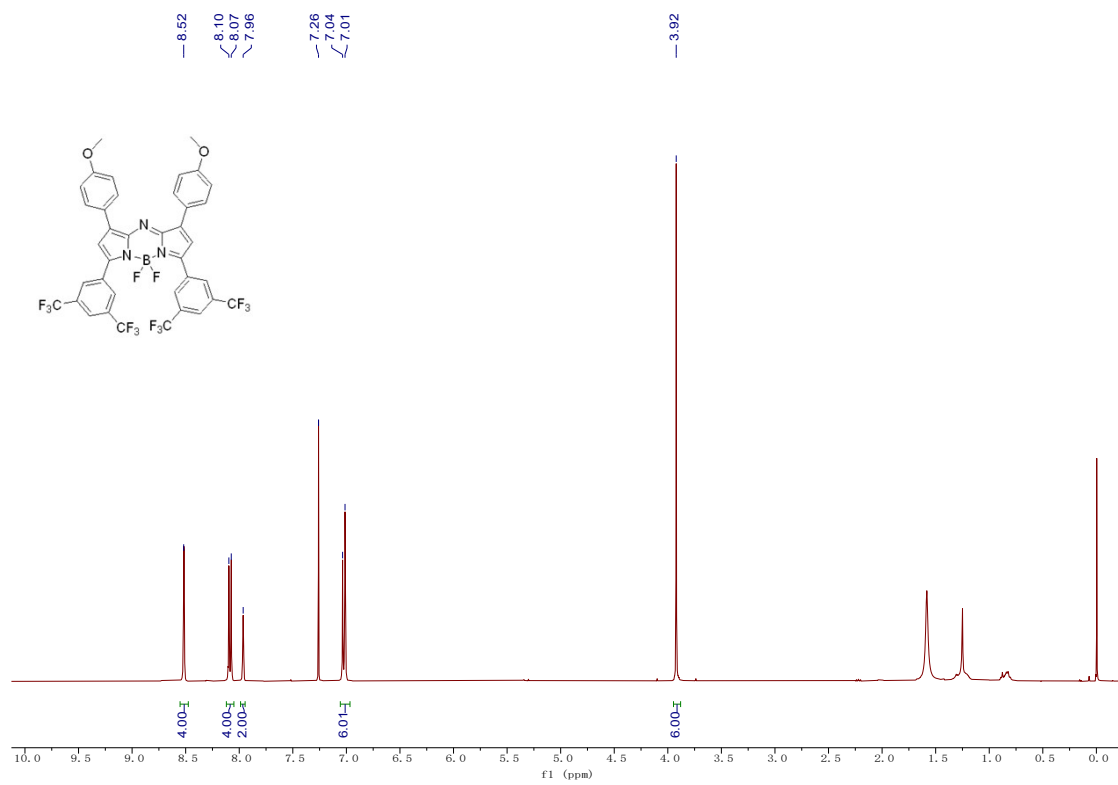

<sup>1</sup>H NMR spectrum of **1e**.

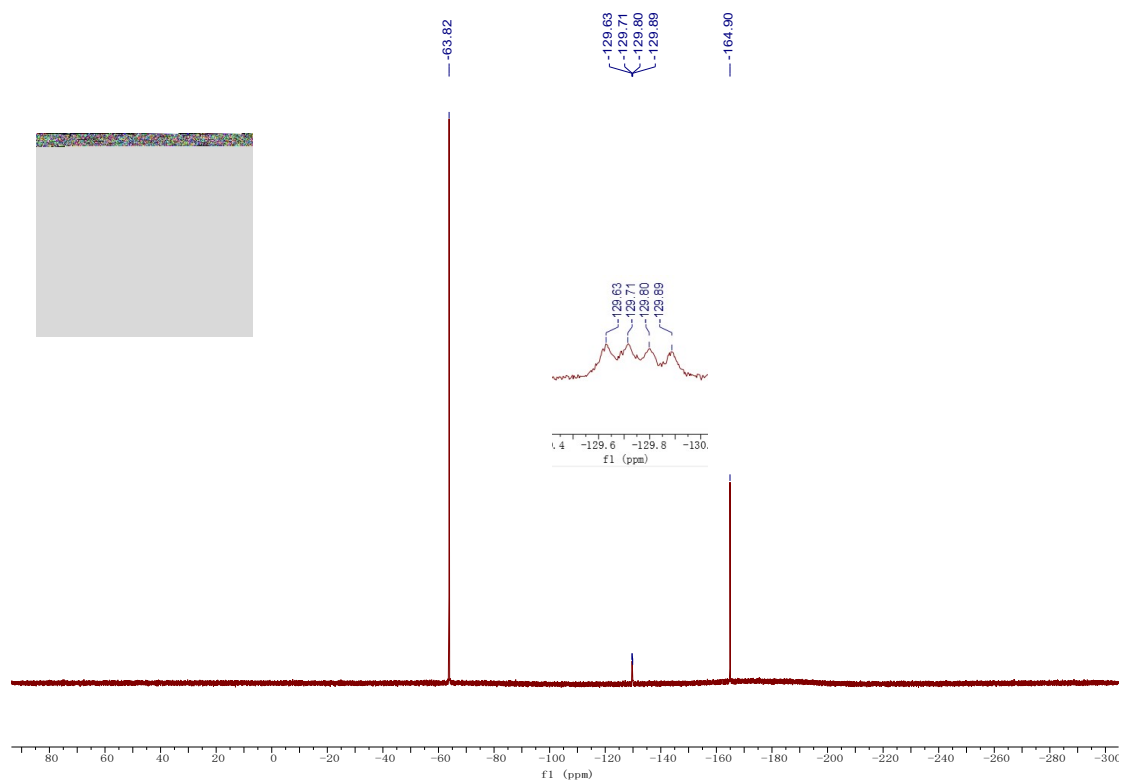

$^{19}\text{F}$  NMR spectrum of **1e**.

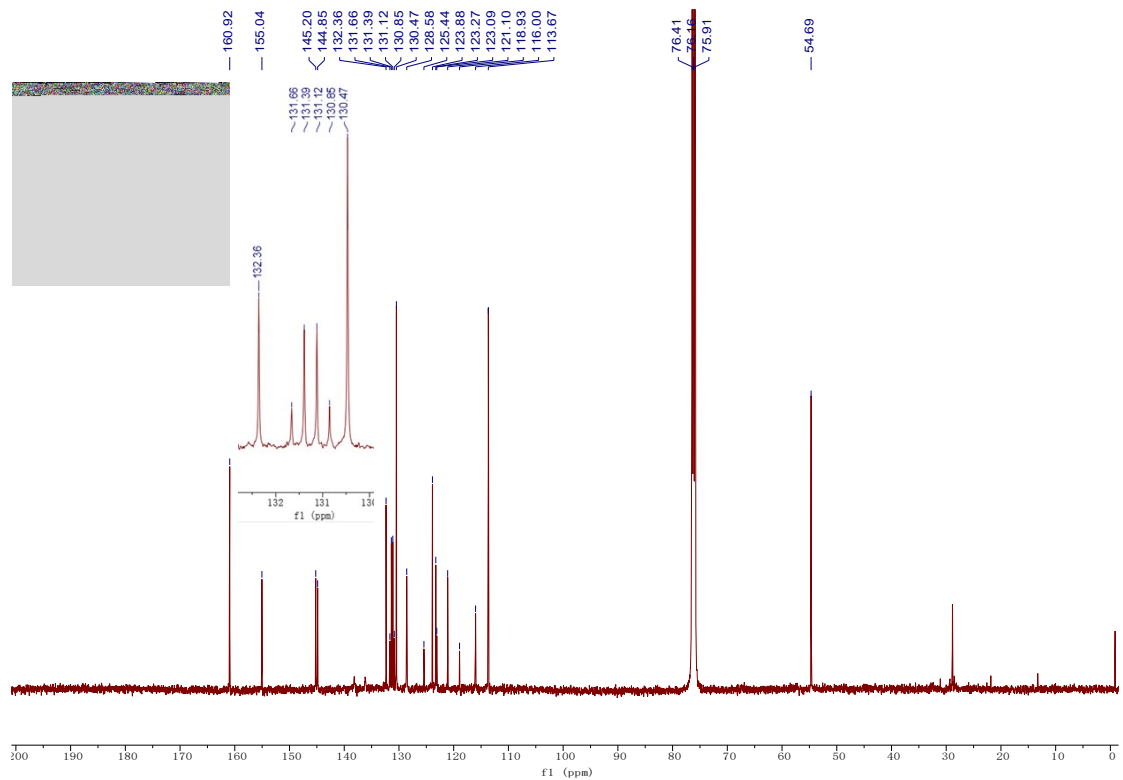

$^{13}\text{C}$  NMR spectrum of **1e**.

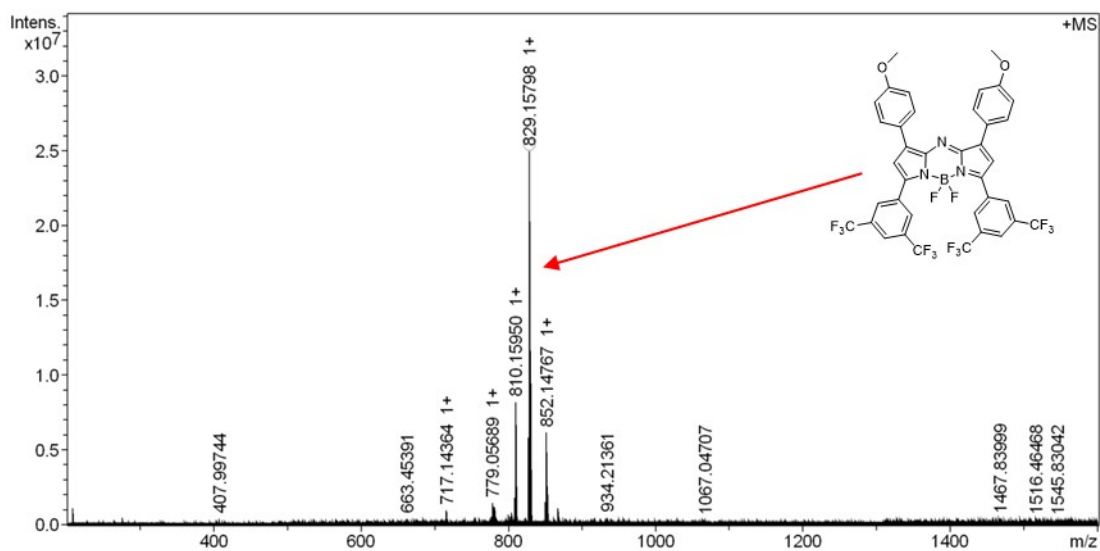

HRMS (MALDI-TOF) spectrum of **1e**.

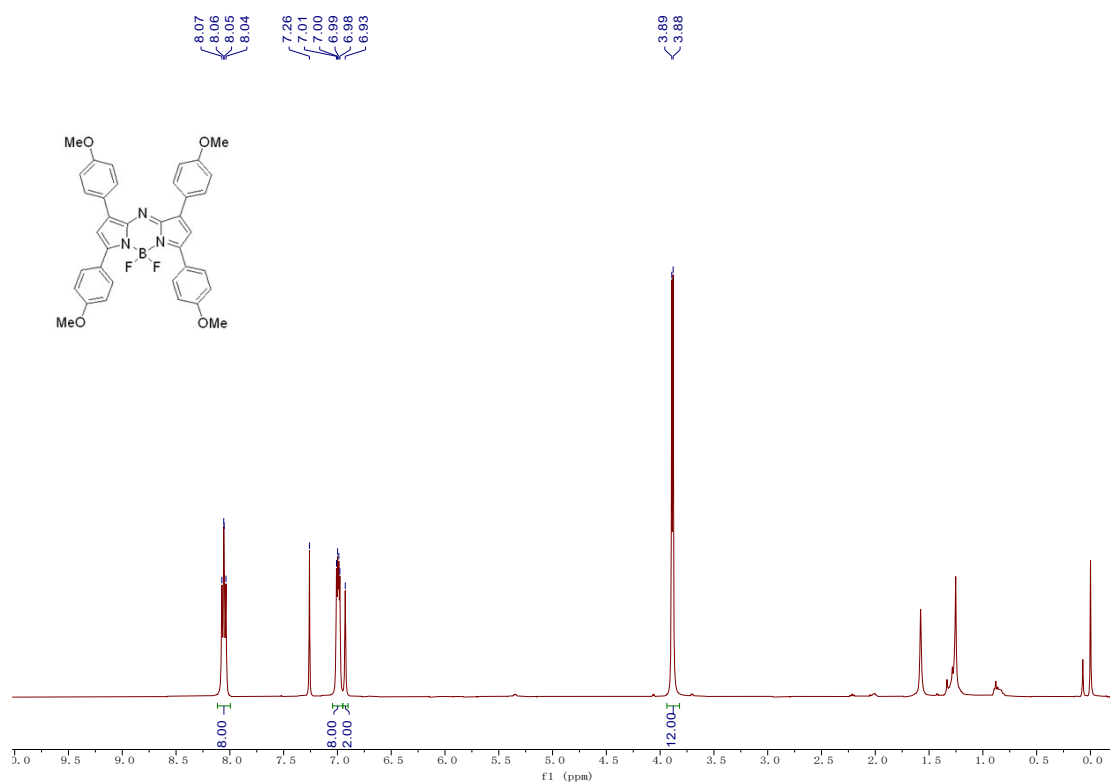

$^1\text{H}$  NMR spectrum of **1f**.

- 1 J. Wang, Y. Wu, W. Sheng, C. Yu, Y. Wei, E. Hao, L. Jiao, *ACS Omega*, 2017, **2**, 2568-2576.
- 2 F. Wilkinson, W. P. Helman, A. B. Ross, *J. Phys. Chem. Ref. Data*, 1993, **22**, 113-262.
- 3 N. Adarsh, R. R. Avirah, D. Ramaiah, *Org. Lett.*, **2010**, **12**, 2720-5723.

- 4 (a) R. Beddoes, D. Heyes, R. S. Menon, C. I. F. Watt, *J. Chem. Soc., Perkin Trans.*, 1996, **2**, 307-319. (b) C. J. Thomson, D. M. Barber, D. J. Dixon, *Angew. Chem. Int. Ed.*, 2019, **58**, 2469-2473.
- 5 J. R. Schmink, J. L. Holcomb, N. E. Leadbeater, *Org. Lett.*, 2009, **11**, 365-368.
- 6 A. Lator, S. Gaillard, A. Poater, J.-L. Renaud, *Chem. Eur. J.*, 2018, **24**, 5770-5774.
- 7 T. Vyas, K. Nimavat, K. Vyas, K. Joshi, *Der Pharmacia Sinica*, 2012, **3**, 266-270.
- 8 R. Ballini, L. Barboni, L. Castrica, F. Fringuelli, D. Lanari, F. Pizzo, L. Vaccaro, *Adv. Synth. Catal.*, 2008, **350**, 1218-1224.
- 9 (a) F. Aznar, C. Valdes, M. P. Cabal, *Tetrahedron Lett.*, 2000, **41**, 5683-5687. (b) T. Jokic, S. M. Borisov, R. Saf, D. A. Nielsen, M. Kühn, I. Klimant, *Anal. Chem.*, 2012, **84**, 6723-6730.
- 10 J. Killoran, L. Allen, J. F. Gallagher, W. M. Gallagher, D. F. O'Shea, *Chem. Commun.*, 2002, 1862-1863.
- 11 W. Sheng, Y. Q. Zheng, Q. Wu, Y. Wu, C. Yu, L. Jiao, E. Hao, J. Y. Wang, J. Pei, *Org. Lett.*, 2017, **19**, 2893-2896.
